# Supplementary material for: Chitosan Induces Plant Hormones and Defenses in Tomato Root Exudates
Source: PubMed Central journal article supplement (PMC7672008; doi:10.3389/fpls.2020.572087), 2020-11-04
Supplement: Data_Sheet_1.pdf [file Data_Sheet_1.pdf]

# Display Report - Selected Window Selected

**Analysis Name** MSU066.D  
**Method:** GENERA~3.M  
**Sample Na** TPQ-1-20  
**Analysis Inf**

**Instrume** LC-MSD-Trap-SL  
**Operator:** Pablo

**Print Da** 03/07/20 01:05:02  
**Acq. Dat** 03/25/20 05:04:43 PM

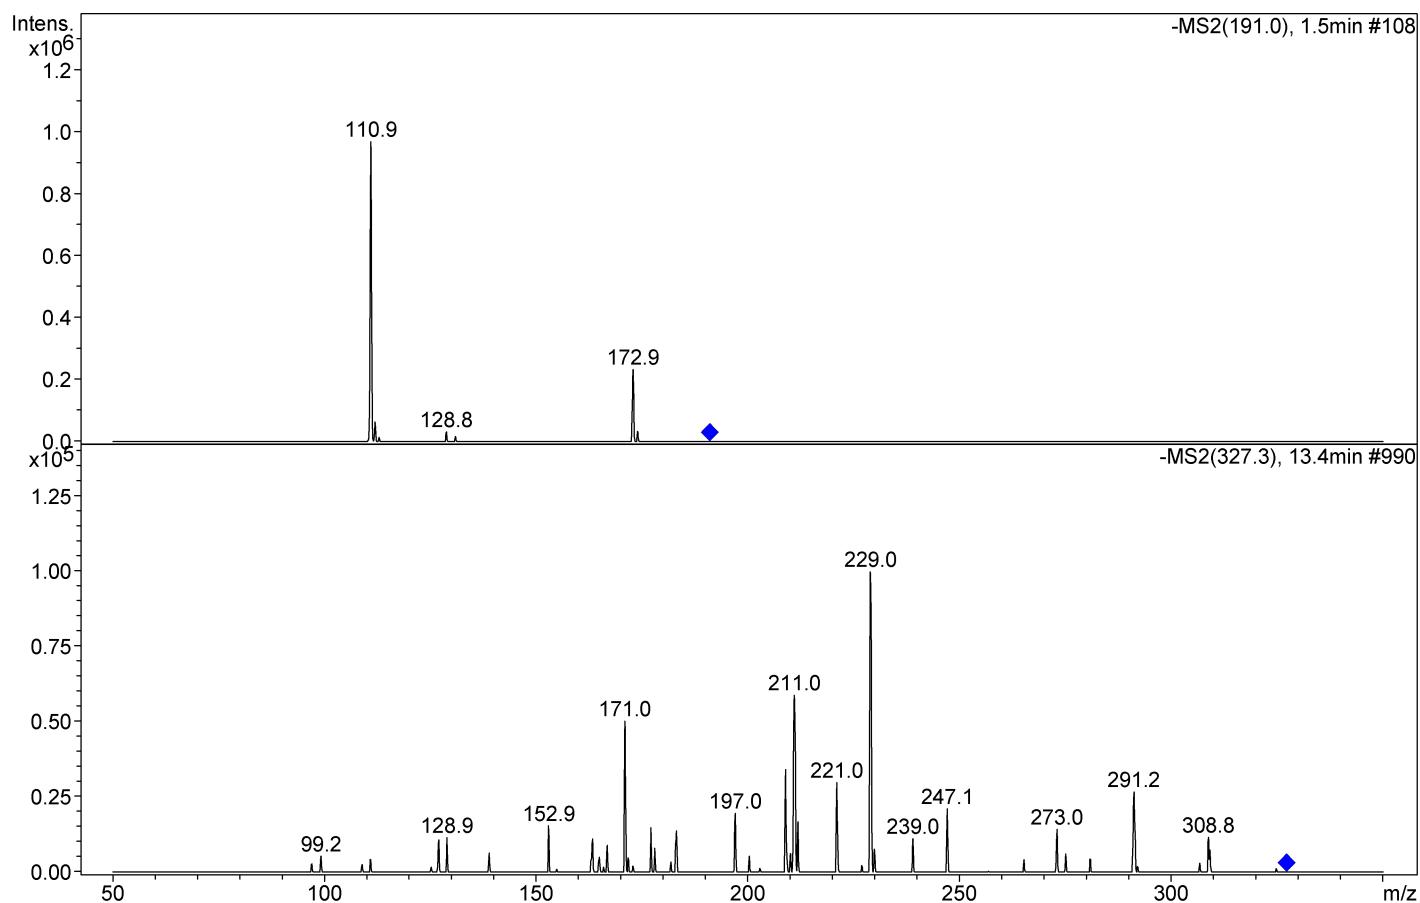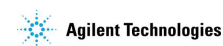

# Compound Mass Spectrum List Report - MS

**Analysis Name:** MSU066.D      **Instrument:** LC-MSD-Trap-SL      **Print Date:** 03/07/2019 01:14:29 PM  
**Method:** GENERA~3.M      **Operator:** Pablo      **Acq. Date:** 02/25/2019 05:04:43 PM  
**Sample Name:** TPQ-1-20  
**Analysis Info:**

## Acquisition Parameter:

|                 |             |                       |             |                |           |
|-----------------|-------------|-----------------------|-------------|----------------|-----------|
| Mass Range Mode | Std/Normal  | Trap Drive            | 35.9        | Scan Begin     | 50 m/z    |
| Ion Polarity    | Negative    | Octopole RF Amplitude | 120.0 Vpp   | Scan End       | 350 m/z   |
| Ion Source Type | ESI         | Capillary Exit        | -106.0 Volt | Averages       | 4 Spectra |
| Dry Temp (Set)  | 350 °C      | Skimmer               | -40.0 Volt  | Max. Accu Time | 200000 µs |
| Nebulizer (Set) | 70.00 psi   | Oct 1 DC              | -12.00 Volt | ICC Target     | 30000     |
| Dry Gas (Set)   | 12.00 l/min | Oct 2 DC              | -1.70 Volt  | Charge Control | on        |

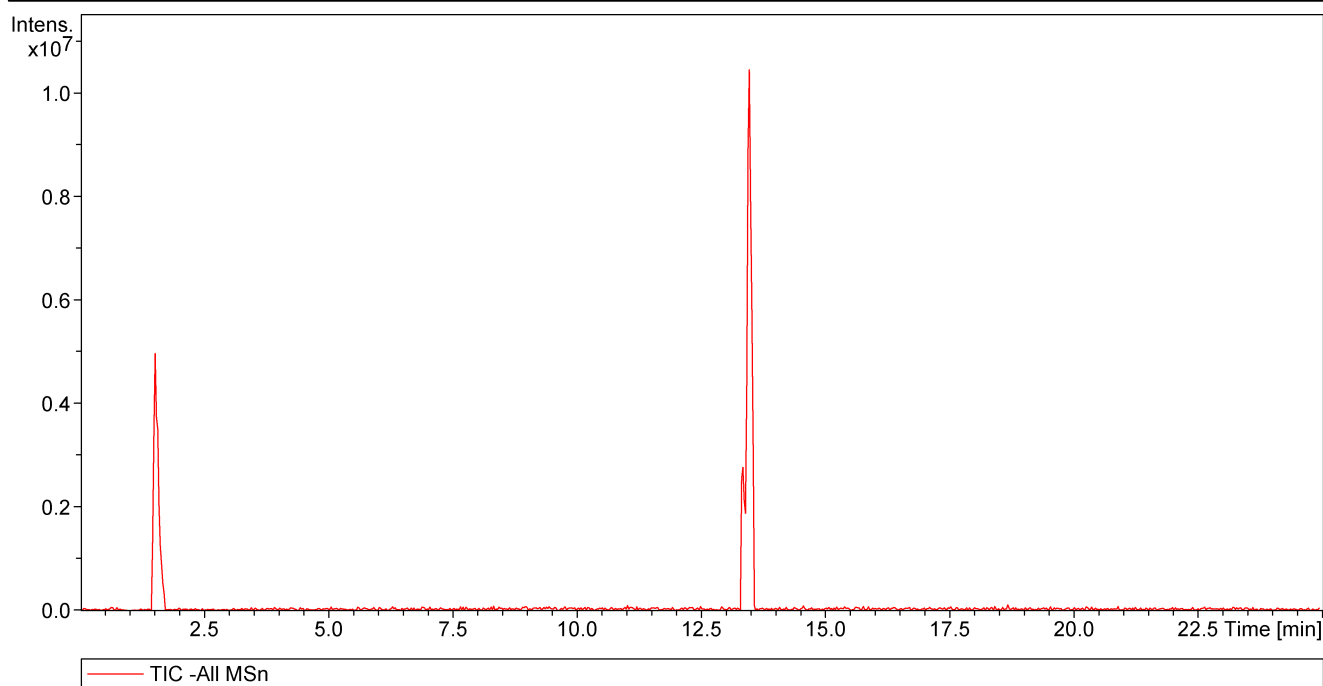

## Compound List:

| #    | RT [min] | Range [min] | Height | Area | Area Frac % |
|------|----------|-------------|--------|------|-------------|
| n.a. | 1.5      | 1.5         | n.a.   | n.a. | n.a.        |
| n.a. | 13.4     | 13.4        | n.a.   | n.a. | n.a.        |

# Compound Mass Spectrum List Report - MS

**-MS2(191.0), 1.5min  
#108**

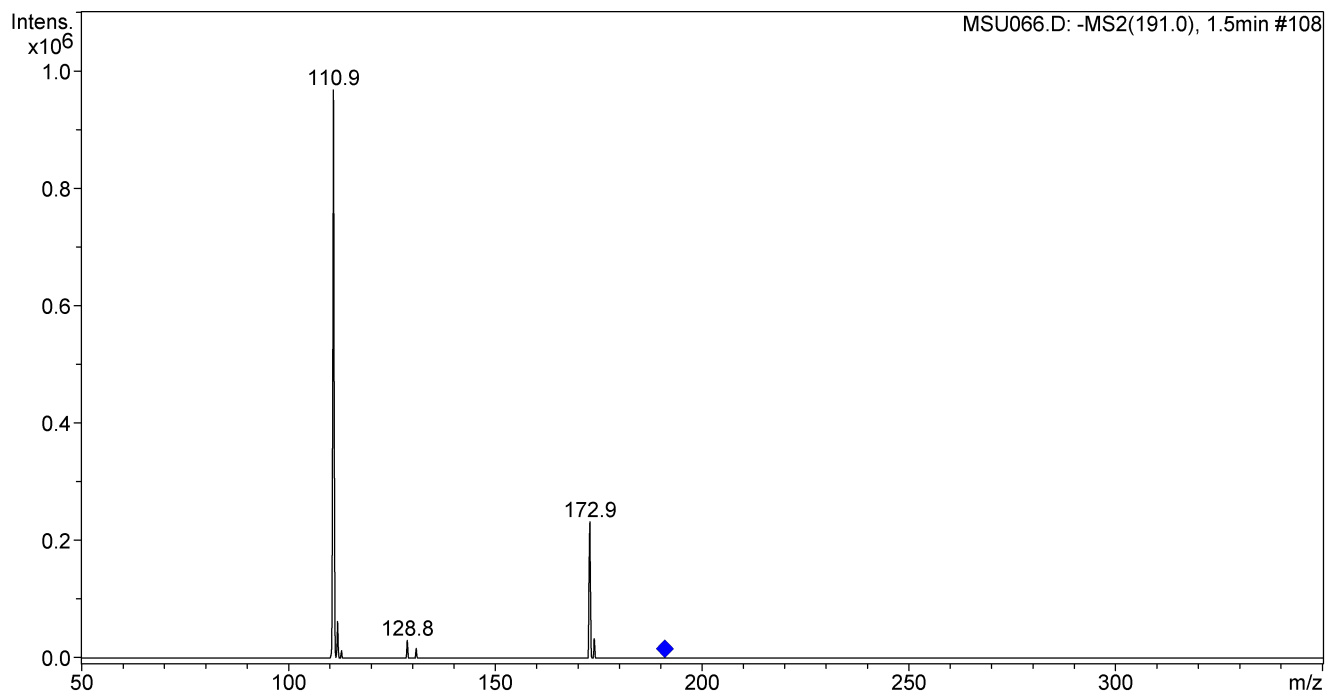

## Mass List:

| # | m/z   | Res. | FWHM | I      | I %   | S/N  |
|---|-------|------|------|--------|-------|------|
| 1 | 110.9 | 307  | 0.4  | 967296 | 100.0 | 69.1 |
| 2 | 111.9 | 409  | 0.3  | 62345  | 6.4   | 4.5  |
| 3 | 128.8 | 501  | 0.3  | 30177  | 3.1   | 2.2  |
| 4 | 130.9 | 560  | 0.2  | 16532  | 1.7   | 1.2  |
| 5 | 172.9 | 466  | 0.4  | 231759 | 24.0  | 16.6 |
| 6 | 173.9 | 681  | 0.3  | 32944  | 3.4   | 2.4  |

# Compound Mass Spectrum List Report - MS

**-MS2(327.3),  
13.4min #990**

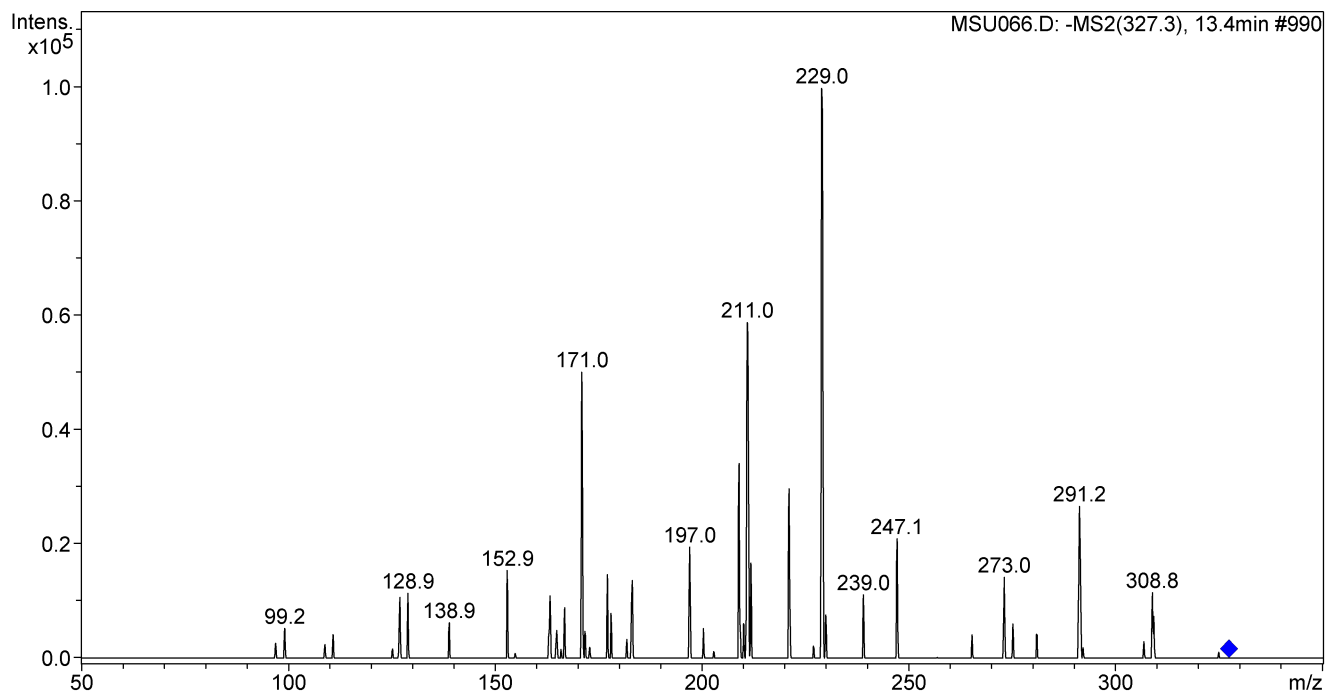

**Mass List:**

| #  | m/z   | Res. | FWHM | I     | I %   | S/N  |
|----|-------|------|------|-------|-------|------|
| 1  | 99.2  | 380  | 0.3  | 5182  | 5.2   | 1.1  |
| 2  | 127.0 | 451  | 0.3  | 10625 | 10.7  | 2.4  |
| 3  | 128.9 | 576  | 0.2  | 11315 | 11.4  | 2.5  |
| 4  | 138.9 | 553  | 0.3  | 6204  | 6.2   | 1.4  |
| 5  | 152.9 | 660  | 0.2  | 15305 | 15.4  | 3.4  |
| 6  | 163.3 | 529  | 0.3  | 10886 | 10.9  | 2.4  |
| 7  | 164.9 | 437  | 0.4  | 4834  | 4.9   | 1.1  |
| 8  | 166.8 | 644  | 0.3  | 8823  | 8.9   | 2.0  |
| 9  | 171.0 | 551  | 0.3  | 50005 | 50.2  | 11.1 |
| 10 | 171.7 | 707  | 0.2  | 4668  | 4.7   | 1.0  |
| 11 | 177.1 | 797  | 0.2  | 14596 | 14.6  | 3.2  |
| 12 | 178.0 | 804  | 0.2  | 7821  | 7.8   | 1.7  |
| 13 | 183.1 | 451  | 0.4  | 13568 | 13.6  | 3.0  |
| 14 | 197.0 | 622  | 0.3  | 19428 | 19.5  | 4.3  |
| 15 | 200.3 | 876  | 0.2  | 5167  | 5.2   | 1.1  |
| 16 | 208.9 | 749  | 0.3  | 34015 | 34.1  | 7.5  |
| 17 | 210.1 | 811  | 0.3  | 6004  | 6.0   | 1.3  |
| 18 | 211.0 | 416  | 0.5  | 58690 | 58.9  | 13.0 |
| 19 | 211.8 | 867  | 0.2  | 16608 | 16.7  | 3.7  |
| 20 | 221.0 | 710  | 0.3  | 29622 | 29.7  | 6.6  |
| 21 | 229.0 | 514  | 0.4  | 99643 | 100.0 | 22.1 |
| 22 | 229.9 | 821  | 0.3  | 7528  | 7.6   | 1.7  |
| 23 | 239.0 | 933  | 0.3  | 11036 | 11.1  | 2.4  |
| 24 | 247.1 | 847  | 0.3  | 20866 | 20.9  | 4.6  |
| 25 | 273.0 | 967  | 0.3  | 14152 | 14.2  | 3.1  |

# Compound Mass Spectrum List Report - MS

---

| #  | m/z   | Res. | FWHM | I     | I %  | S/N |
|----|-------|------|------|-------|------|-----|
| 26 | 275.1 | 1110 | 0.2  | 5954  | 6.0  | 1.3 |
| 27 | 291.2 | 634  | 0.5  | 26532 | 26.6 | 5.9 |
| 28 | 308.8 | 1363 | 0.2  | 11432 | 11.5 | 2.5 |
| 29 | 309.1 | 1545 | 0.2  | 7272  | 7.3  | 1.6 |

# Display Report - Selected Window Selected

**Analysis Name** MSU067.D  
**Method:** GENERA~3.M  
**Sample Na** TPQ-2-20  
**Analysis Inf**

**Instrume** LC-MSD-Trap-SL  
**Operator:** Pablo

**Print Da** 03/07/2 01:06:33  
**Acq. Dat** 02/25/2011  
05:32:47 PM

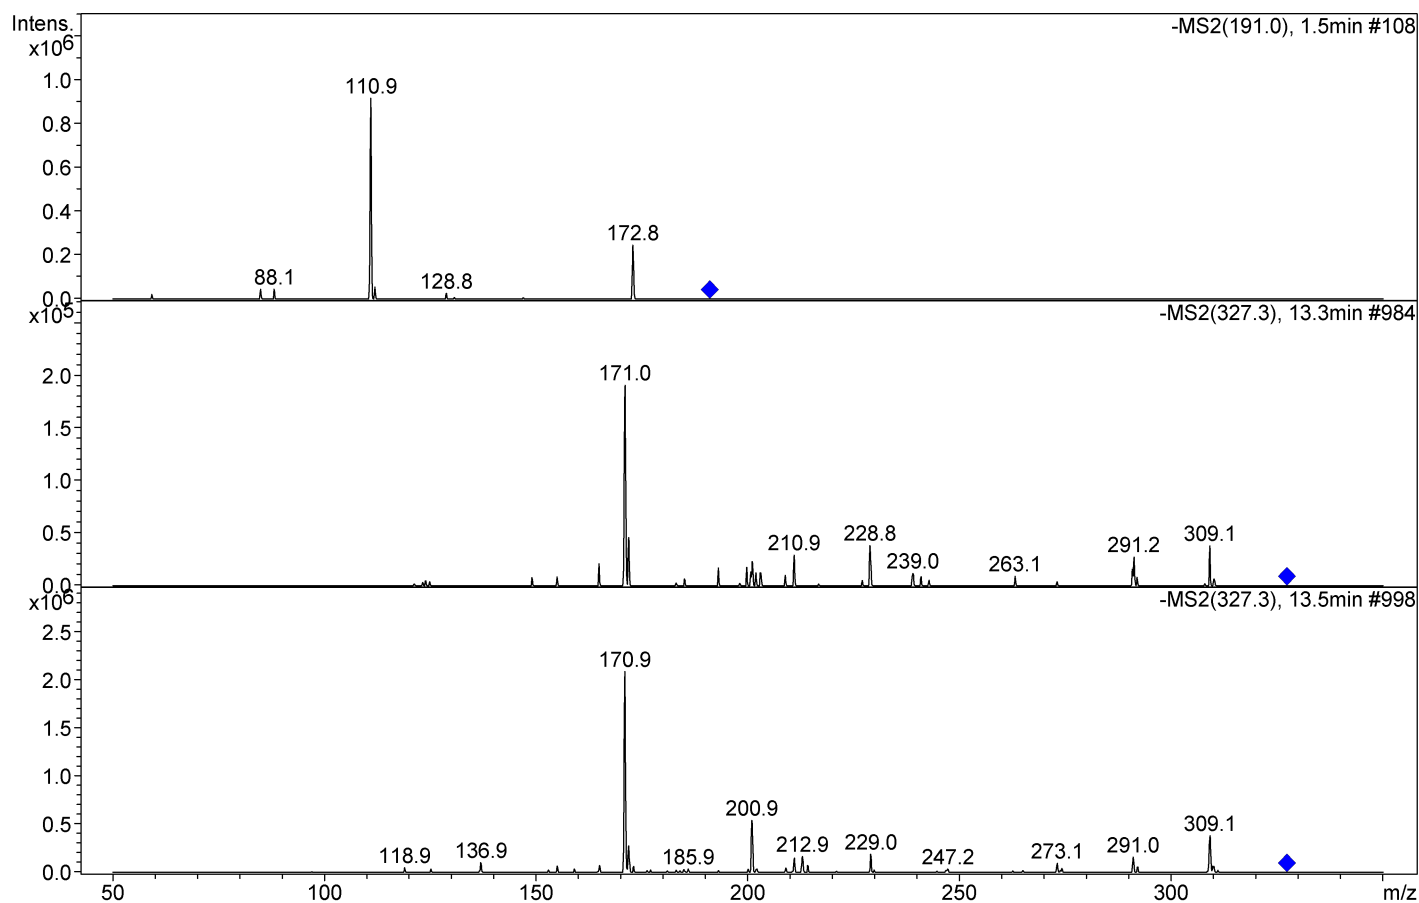

# Compound Mass Spectrum List Report - MS

**Analysis Name:** MSU067.D      **Instrument:** LC-MSD-Trap-SL      **Print Date:** 03/07/2019 03:33:38 PM  
**Method:** GENERA~3.M      **Operator:** Pablo      **Acq. Date:** 02/25/2019 05:32:47 PM  
**Sample Name:** TPQ-2-20  
**Analysis Info:**

## Acquisition Parameter:

|                 |             |                       |             |                |           |
|-----------------|-------------|-----------------------|-------------|----------------|-----------|
| Mass Range Mode | Std/Normal  | Trap Drive            | 35.9        | Scan Begin     | 50 m/z    |
| Ion Polarity    | Negative    | Octopole RF Amplitude | 120.0 Vpp   | Scan End       | 350 m/z   |
| Ion Source Type | ESI         | Capillary Exit        | -106.0 Volt | Averages       | 4 Spectra |
| Dry Temp (Set)  | 350 °C      | Skimmer               | -40.0 Volt  | Max. Accu Time | 200000 µs |
| Nebulizer (Set) | 70.00 psi   | Oct 1 DC              | -12.00 Volt | ICC Target     | 30000     |
| Dry Gas (Set)   | 12.00 l/min | Oct 2 DC              | -1.70 Volt  | Charge Control | on        |

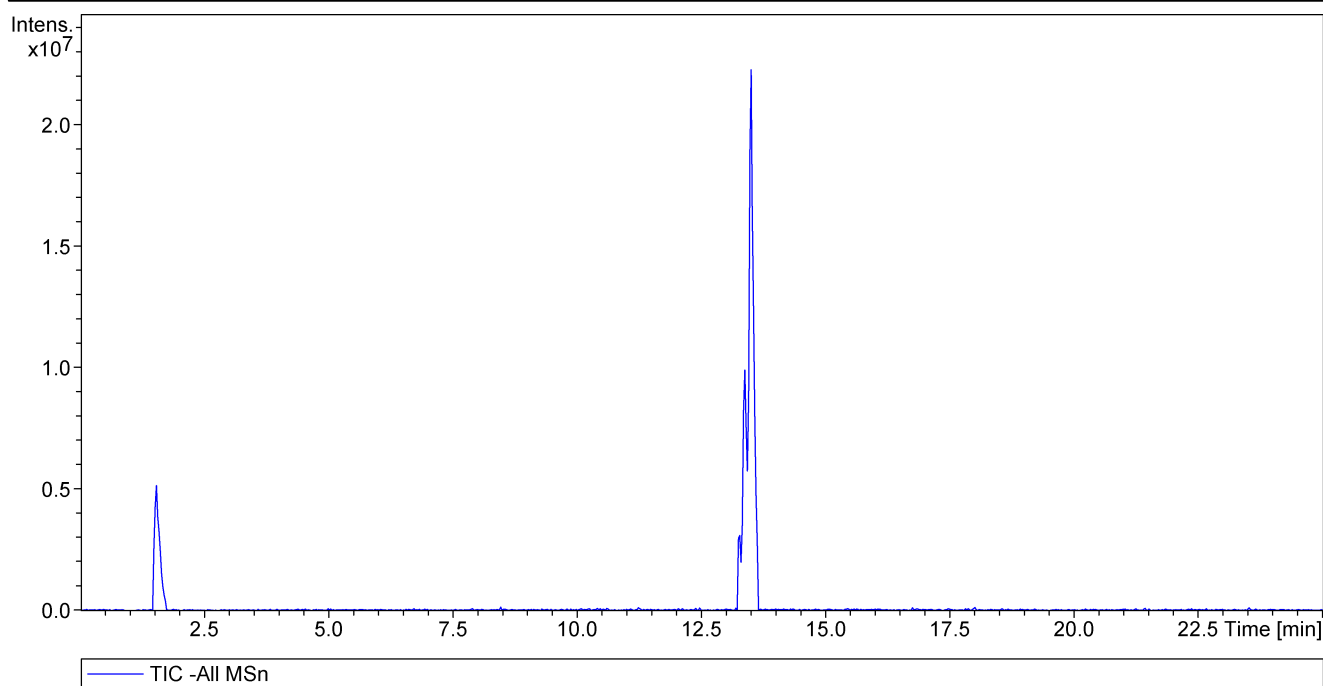

## Compound List:

| #    | RT [min] | Range [min] | Height | Area | Area Frac % |
|------|----------|-------------|--------|------|-------------|
| n.a. | 1.5      | 1.5         | n.a.   | n.a. | n.a.        |
| n.a. | 13.3     | 13.3        | n.a.   | n.a. | n.a.        |
| n.a. | 13.5     | 13.5        | n.a.   | n.a. | n.a.        |

# Compound Mass Spectrum List Report - MS

**-MS2(191.0), 1.5min  
#108**

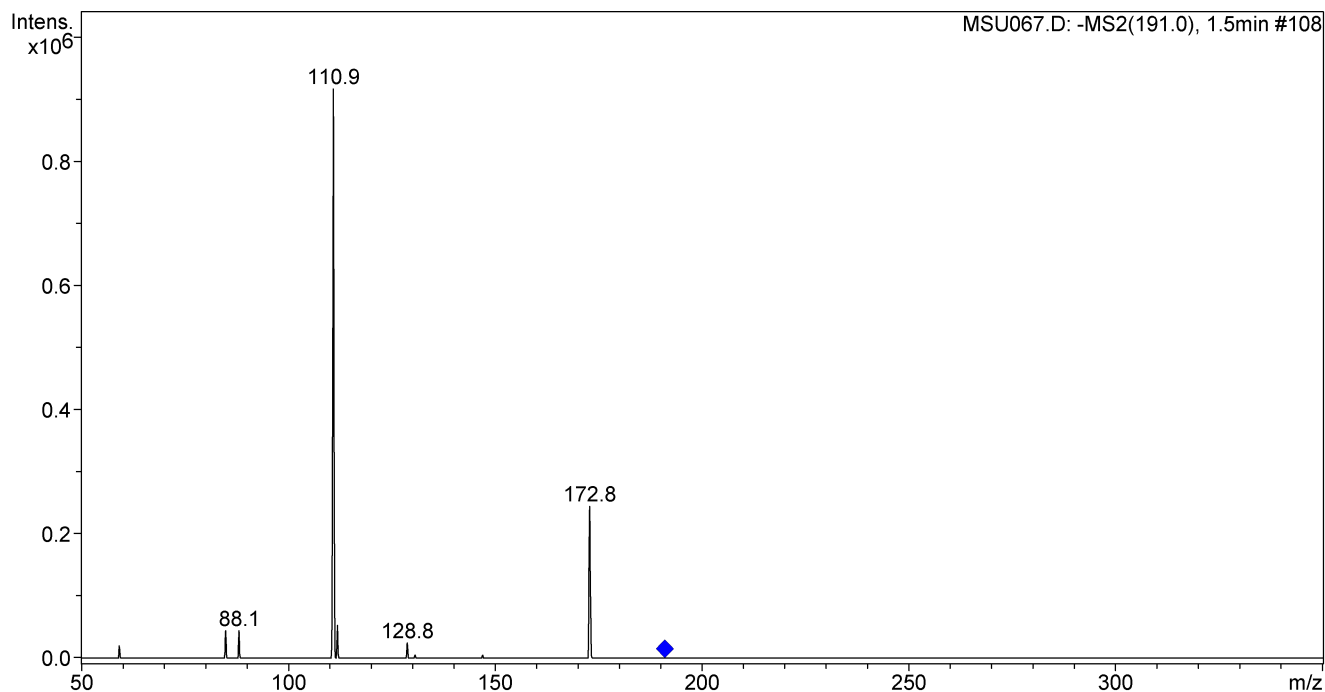

## Mass List:

| # | m/z   | Res. | FWHM | I      | I %   | S/N  |
|---|-------|------|------|--------|-------|------|
| 1 | 84.9  | 339  | 0.3  | 43780  | 4.8   | 2.2  |
| 2 | 88.1  | 391  | 0.2  | 44158  | 4.8   | 2.2  |
| 3 | 110.9 | 329  | 0.3  | 916151 | 100.0 | 45.9 |
| 4 | 111.9 | 433  | 0.3  | 52955  | 5.8   | 2.7  |
| 5 | 128.8 | 508  | 0.3  | 24288  | 2.7   | 1.2  |
| 6 | 172.8 | 499  | 0.3  | 244337 | 26.7  | 12.2 |



# Compound Mass Spectrum List Report - MS

**-MS2(327.3),  
13.3min #984**

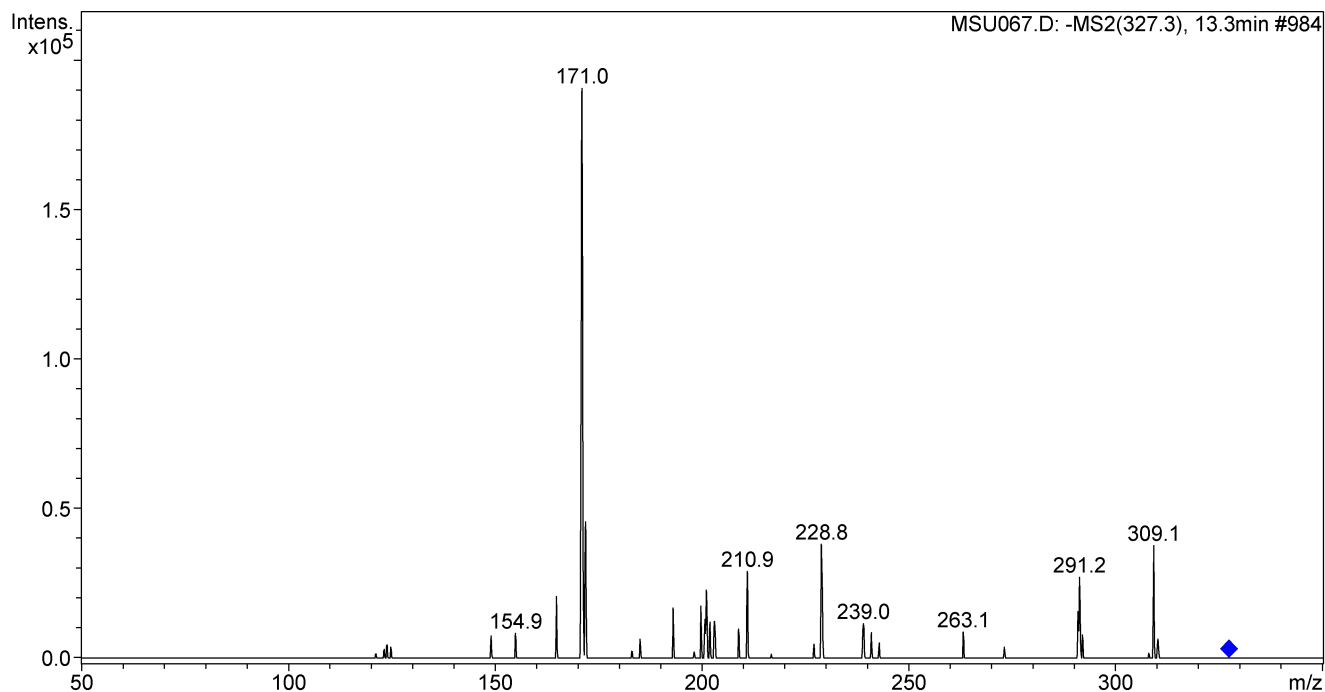

## Mass List:

| #  | m/z   | Res. | FWHM | I      | I %   | S/N  |
|----|-------|------|------|--------|-------|------|
| 1  | 149.0 | 658  | 0.2  | 7381   | 3.9   | 1.5  |
| 2  | 154.9 | 671  | 0.2  | 8228   | 4.3   | 1.7  |
| 3  | 164.8 | 729  | 0.2  | 20565  | 10.8  | 4.2  |
| 4  | 171.0 | 446  | 0.4  | 190455 | 100.0 | 38.5 |
| 5  | 171.8 | 545  | 0.3  | 45514  | 23.9  | 9.2  |
| 6  | 185.0 | 772  | 0.2  | 6344   | 3.3   | 1.3  |
| 7  | 193.0 | 856  | 0.2  | 16684  | 8.8   | 3.4  |
| 8  | 199.7 | 867  | 0.2  | 17369  | 9.1   | 3.5  |
| 9  | 200.7 | 996  | 0.2  | 13024  | 6.8   | 2.6  |
| 10 | 201.0 | 755  | 0.3  | 22681  | 11.9  | 4.6  |
| 11 | 201.9 | 785  | 0.3  | 12016  | 6.3   | 2.4  |
| 12 | 203.0 | 520  | 0.4  | 12193  | 6.4   | 2.5  |
| 13 | 208.8 | 881  | 0.2  | 9636   | 5.1   | 1.9  |
| 14 | 210.9 | 743  | 0.3  | 28939  | 15.2  | 5.9  |
| 15 | 228.8 | 604  | 0.4  | 38060  | 20.0  | 7.7  |
| 16 | 239.0 | 551  | 0.4  | 11501  | 6.0   | 2.3  |
| 17 | 240.9 | 965  | 0.2  | 8487   | 4.5   | 1.7  |
| 18 | 242.8 | 974  | 0.2  | 5006   | 2.6   | 1.0  |
| 19 | 263.1 | 1163 | 0.2  | 8730   | 4.6   | 1.8  |
| 20 | 290.8 | 1498 | 0.2  | 15586  | 8.2   | 3.2  |
| 21 | 291.2 | 1157 | 0.3  | 27041  | 14.2  | 5.5  |
| 22 | 291.9 | 1263 | 0.2  | 7746   | 4.1   | 1.6  |
| 23 | 309.1 | 1240 | 0.2  | 37637  | 19.8  | 7.6  |
| 24 | 310.1 | 840  | 0.4  | 6294   | 3.3   | 1.3  |

# Compound Mass Spectrum List Report - MS

**-MS2(327.3),  
13.5min #998**

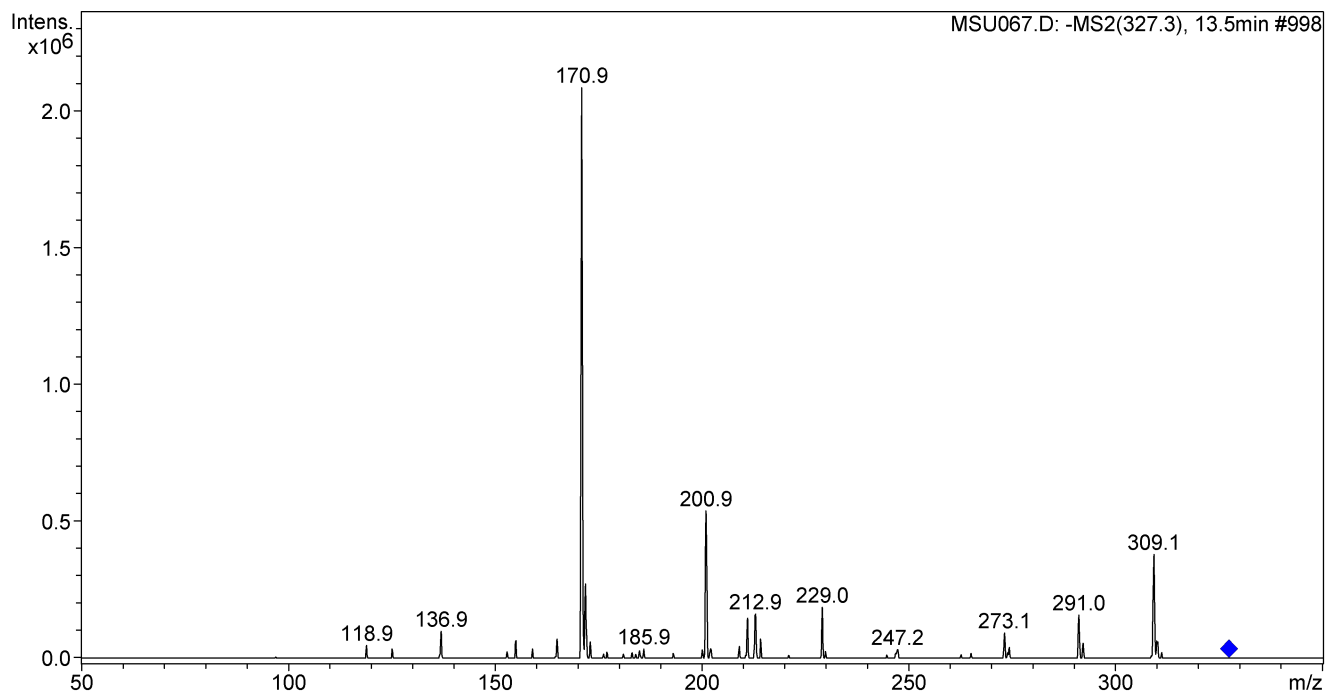

**Mass List:**

| #  | m/z   | Res. | FWHM | I       | I %   | S/N   |
|----|-------|------|------|---------|-------|-------|
| 1  | 118.9 | 522  | 0.2  | 45961   | 2.2   | 2.7   |
| 2  | 125.1 | 543  | 0.2  | 32366   | 1.6   | 1.9   |
| 3  | 136.9 | 502  | 0.3  | 97377   | 4.7   | 5.7   |
| 4  | 152.9 | 604  | 0.3  | 22882   | 1.1   | 1.3   |
| 5  | 155.0 | 600  | 0.3  | 63424   | 3.0   | 3.7   |
| 6  | 159.0 | 714  | 0.2  | 32747   | 1.6   | 1.9   |
| 7  | 165.0 | 585  | 0.3  | 68667   | 3.3   | 4.0   |
| 8  | 170.9 | 485  | 0.4  | 2083942 | 100.0 | 122.2 |
| 9  | 171.8 | 523  | 0.3  | 270977  | 13.0  | 15.9  |
| 10 | 173.0 | 649  | 0.3  | 58447   | 2.8   | 3.4   |
| 11 | 177.0 | 780  | 0.2  | 21527   | 1.0   | 1.3   |
| 12 | 184.9 | 640  | 0.3  | 25897   | 1.2   | 1.5   |
| 13 | 185.9 | 689  | 0.3  | 33109   | 1.6   | 1.9   |
| 14 | 200.1 | 763  | 0.3  | 29491   | 1.4   | 1.7   |
| 15 | 200.9 | 498  | 0.4  | 537615  | 25.8  | 31.5  |
| 16 | 202.1 | 454  | 0.4  | 33675   | 1.6   | 2.0   |
| 17 | 209.0 | 728  | 0.3  | 42663   | 2.0   | 2.5   |
| 18 | 211.0 | 703  | 0.3  | 145798  | 7.0   | 8.6   |
| 19 | 212.9 | 556  | 0.4  | 160862  | 7.7   | 9.4   |
| 20 | 214.1 | 845  | 0.3  | 69156   | 3.3   | 4.1   |
| 21 | 229.0 | 839  | 0.3  | 185266  | 8.9   | 10.9  |
| 22 | 229.8 | 1013 | 0.2  | 23688   | 1.1   | 1.4   |
| 23 | 247.2 | 368  | 0.7  | 31149   | 1.5   | 1.8   |
| 24 | 273.1 | 915  | 0.3  | 91740   | 4.4   | 5.4   |
| 25 | 274.2 | 1135 | 0.2  | 38885   | 1.9   | 2.3   |

# Compound Mass Spectrum List Report - MS

---

| #  | m/z   | Res. | FWHM | I      | I %  | S/N  |
|----|-------|------|------|--------|------|------|
| 26 | 291.0 | 848  | 0.3  | 156807 | 7.5  | 9.2  |
| 27 | 292.0 | 953  | 0.3  | 53801  | 2.6  | 3.2  |
| 28 | 309.1 | 724  | 0.4  | 378843 | 18.2 | 22.2 |
| 29 | 309.9 | 654  | 0.5  | 62392  | 3.0  | 3.7  |
| 30 | 310.0 | 637  | 0.5  | 58764  | 2.8  | 3.4  |

# Display Report - Selected Window Selected

**Analysis Name** MSU068.D  
**Method:** GENERA~4.M  
**Sample Na** TPQ-1-20  
**Analysis Inf**

**Instrume** LC-MSD-Trap-SL  
**Operator:** Pablo

**Print Da** 03/07/20 01:13:28  
**Acq. Dat** 03/27/20 PM  
12:58:07 PM

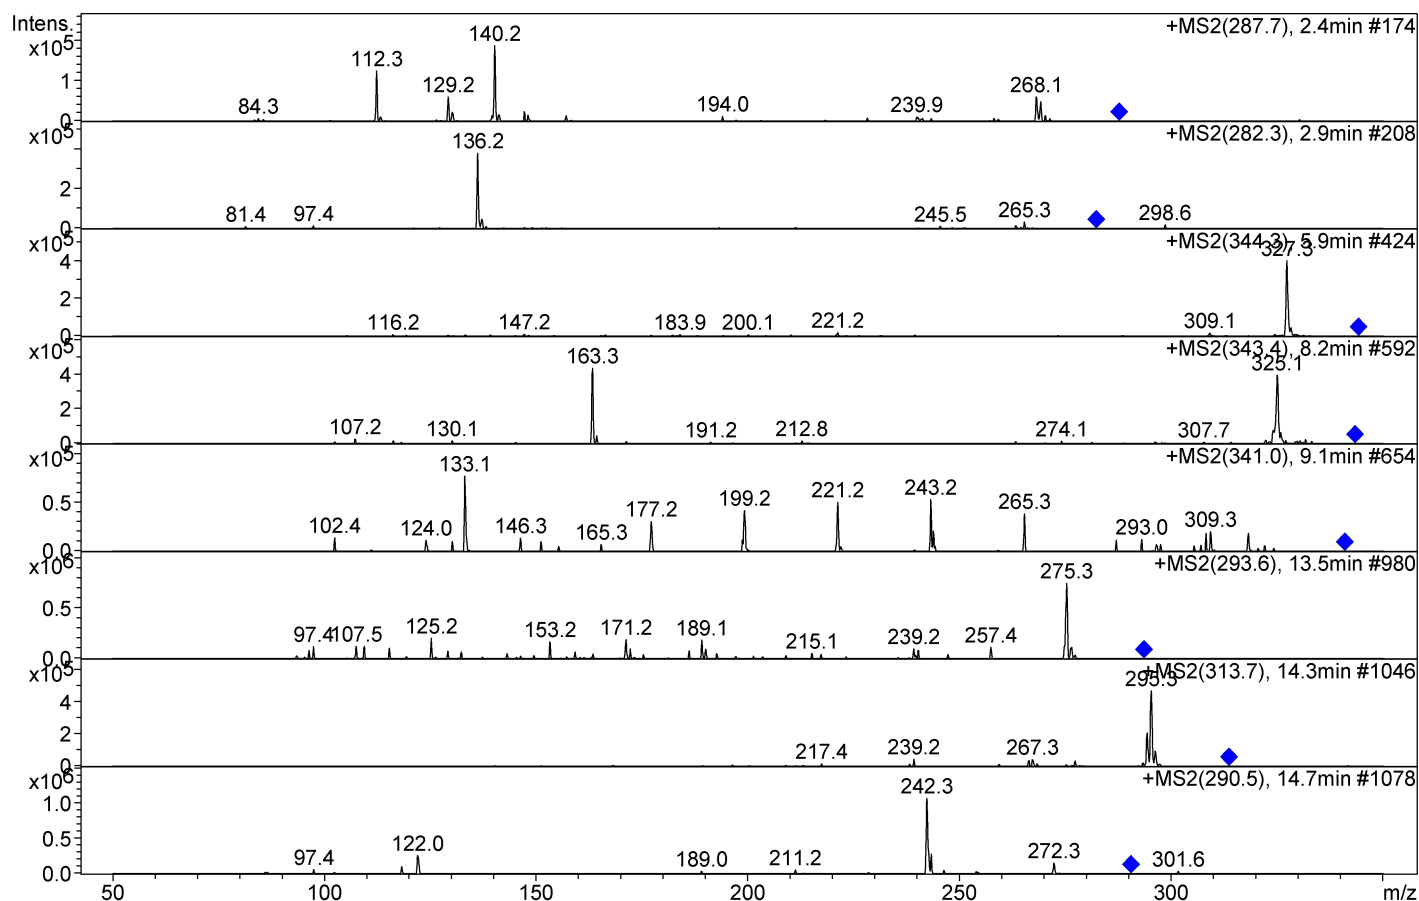

# Compound Mass Spectrum List Report - MS

**Analysis Name:** MSU068.D      **Instrument:** LC-MSD-Trap-SL      **Print Date:** 03/07/2019 03:33:56 PM  
**Method:** GENERA~4.M      **Operator:** Pablo      **Acq. Date:** 02/27/2019 12:58:07 PM  
**Sample Name:** TPQ-1-20  
**Analysis Info:**

## Acquisition Parameter:

|                 |             |                       |            |                |           |
|-----------------|-------------|-----------------------|------------|----------------|-----------|
| Mass Range Mode | Std/Normal  | Trap Drive            | 49.6       | Scan Begin     | 50 m/z    |
| Ion Polarity    | Positive    | Octopole RF Amplitude | 120.0 Vpp  | Scan End       | 350 m/z   |
| Ion Source Type | ESI         | Capillary Exit        | 106.0 Volt | Averages       | 4 Spectra |
| Dry Temp (Set)  | 350 °C      | Skimmer               | 40.0 Volt  | Max. Accu Time | 200000 µs |
| Nebulizer (Set) | 70.00 psi   | Oct 1 DC              | 12.00 Volt | ICC Target     | 30000     |
| Dry Gas (Set)   | 12.00 l/min | Oct 2 DC              | 1.70 Volt  | Charge Control | on        |

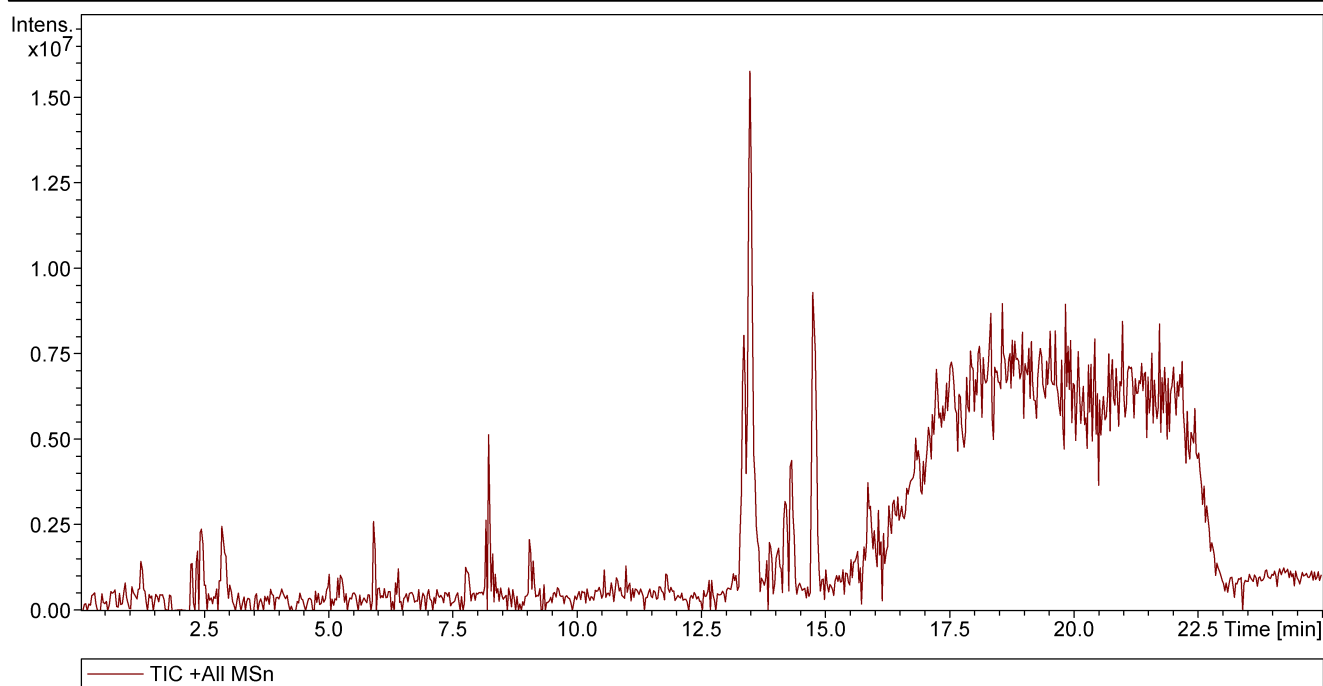

## Compound List:

| #    | RT [min] | Range [min] | Height | Area | Area Frac % |
|------|----------|-------------|--------|------|-------------|
| n.a. | 2.4      | 2.4         | n.a.   | n.a. | n.a.        |
| n.a. | 2.9      | 2.9         | n.a.   | n.a. | n.a.        |
| n.a. | 5.9      | 5.9         | n.a.   | n.a. | n.a.        |
| n.a. | 8.2      | 8.2         | n.a.   | n.a. | n.a.        |
| n.a. | 9.1      | 9.1         | n.a.   | n.a. | n.a.        |
| n.a. | 13.5     | 13.5        | n.a.   | n.a. | n.a.        |
| n.a. | 14.3     | 14.3        | n.a.   | n.a. | n.a.        |
| n.a. | 14.7     | 14.7        | n.a.   | n.a. | n.a.        |

# Compound Mass Spectrum List Report - MS

**+MS2(287.7),  
2.4min #174**

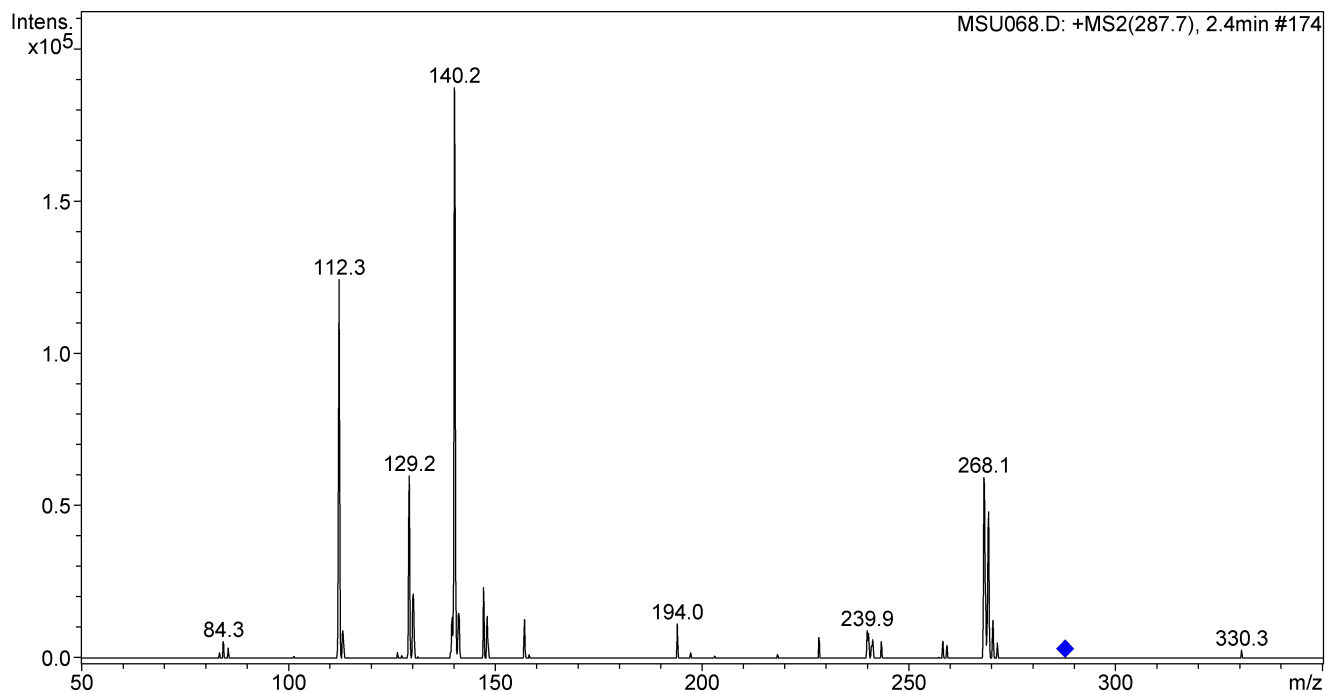

**Mass List:**

| #  | m/z   | Res. | FWHM | I      | I %   | S/N   |
|----|-------|------|------|--------|-------|-------|
| 1  | 84.3  | 346  | 0.2  | 5373   | 2.9   | 3.0   |
| 2  | 85.5  | 387  | 0.2  | 3300   | 1.8   | 1.9   |
| 3  | 112.3 | 356  | 0.3  | 124156 | 66.3  | 69.9  |
| 4  | 113.2 | 284  | 0.4  | 8910   | 4.8   | 5.0   |
| 5  | 126.4 | 571  | 0.2  | 1782   | 1.0   | 1.0   |
| 6  | 129.2 | 381  | 0.3  | 59742  | 31.9  | 33.6  |
| 7  | 130.2 | 294  | 0.4  | 21003  | 11.2  | 11.8  |
| 8  | 139.6 | 638  | 0.2  | 13320  | 7.1   | 7.5   |
| 9  | 140.2 | 414  | 0.3  | 187189 | 100.0 | 105.4 |
| 10 | 141.2 | 325  | 0.4  | 14635  | 7.8   | 8.2   |
| 11 | 147.2 | 596  | 0.2  | 23174  | 12.4  | 13.0  |
| 12 | 148.1 | 532  | 0.3  | 13734  | 7.3   | 7.7   |
| 13 | 157.1 | 547  | 0.3  | 12631  | 6.7   | 7.1   |
| 14 | 194.0 | 869  | 0.2  | 11175  | 6.0   | 6.3   |
| 15 | 228.2 | 972  | 0.2  | 6719   | 3.6   | 3.8   |
| 16 | 239.9 | 1106 | 0.2  | 8999   | 4.8   | 5.1   |
| 17 | 240.2 | 1180 | 0.2  | 8075   | 4.3   | 4.5   |
| 18 | 241.2 | 448  | 0.5  | 6032   | 3.2   | 3.4   |
| 19 | 243.3 | 1040 | 0.2  | 5336   | 2.9   | 3.0   |
| 20 | 258.2 | 994  | 0.3  | 5432   | 2.9   | 3.1   |
| 21 | 259.1 | 1029 | 0.3  | 4095   | 2.2   | 2.3   |
| 22 | 268.1 | 694  | 0.4  | 59232  | 31.6  | 33.4  |
| 23 | 269.2 | 791  | 0.3  | 47914  | 25.6  | 27.0  |
| 24 | 270.3 | 975  | 0.3  | 12367  | 6.6   | 7.0   |
| 25 | 271.3 | 1190 | 0.2  | 4960   | 2.6   | 2.8   |

# Compound Mass Spectrum List Report - MS

---

| #  | m/z   | Res. | FWHM | I    | I % | S/N |
|----|-------|------|------|------|-----|-----|
| 26 | 330.3 | 1407 | 0.2  | 2571 | 1.4 | 1.4 |

# Compound Mass Spectrum List Report - MS

+MS2(282.3),  
2.9min #208

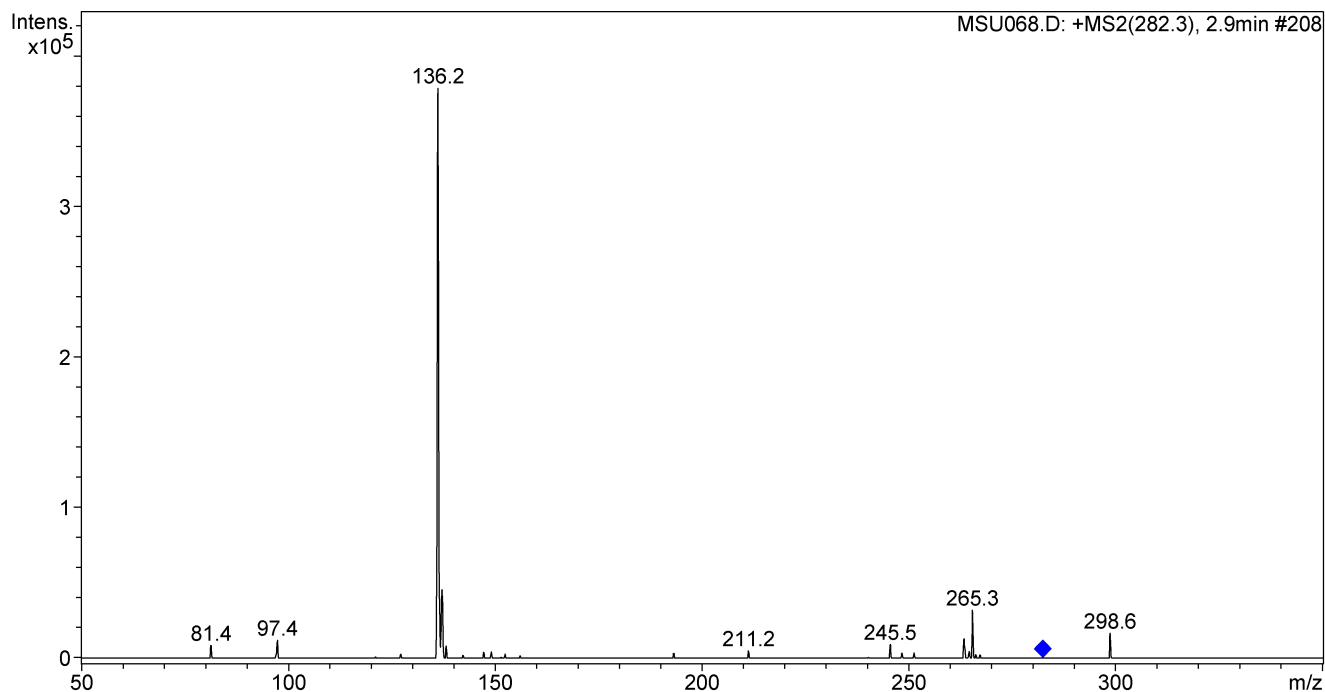

## Mass List:

| #  | m/z   | Res. | FWHM | I      | I %   | S/N   |
|----|-------|------|------|--------|-------|-------|
| 1  | 81.4  | 314  | 0.3  | 8442   | 2.2   | 2.3   |
| 2  | 97.4  | 365  | 0.3  | 11844  | 3.1   | 3.3   |
| 3  | 136.2 | 372  | 0.4  | 378347 | 100.0 | 104.6 |
| 4  | 137.2 | 325  | 0.4  | 45311  | 12.0  | 12.5  |
| 5  | 138.2 | 544  | 0.3  | 7863   | 2.1   | 2.2   |
| 6  | 147.2 | 598  | 0.2  | 3860   | 1.0   | 1.1   |
| 7  | 149.1 | 600  | 0.2  | 4039   | 1.1   | 1.1   |
| 8  | 211.2 | 928  | 0.2  | 4806   | 1.3   | 1.3   |
| 9  | 245.5 | 939  | 0.3  | 8904   | 2.4   | 2.5   |
| 10 | 263.3 | 775  | 0.3  | 12880  | 3.4   | 3.6   |
| 11 | 264.5 | 960  | 0.3  | 4245   | 1.1   | 1.2   |
| 12 | 265.3 | 1120 | 0.2  | 31833  | 8.4   | 8.8   |
| 13 | 298.6 | 1156 | 0.3  | 16399  | 4.3   | 4.5   |



# Compound Mass Spectrum List Report - MS

+MS2(344.3),  
5.9min #424

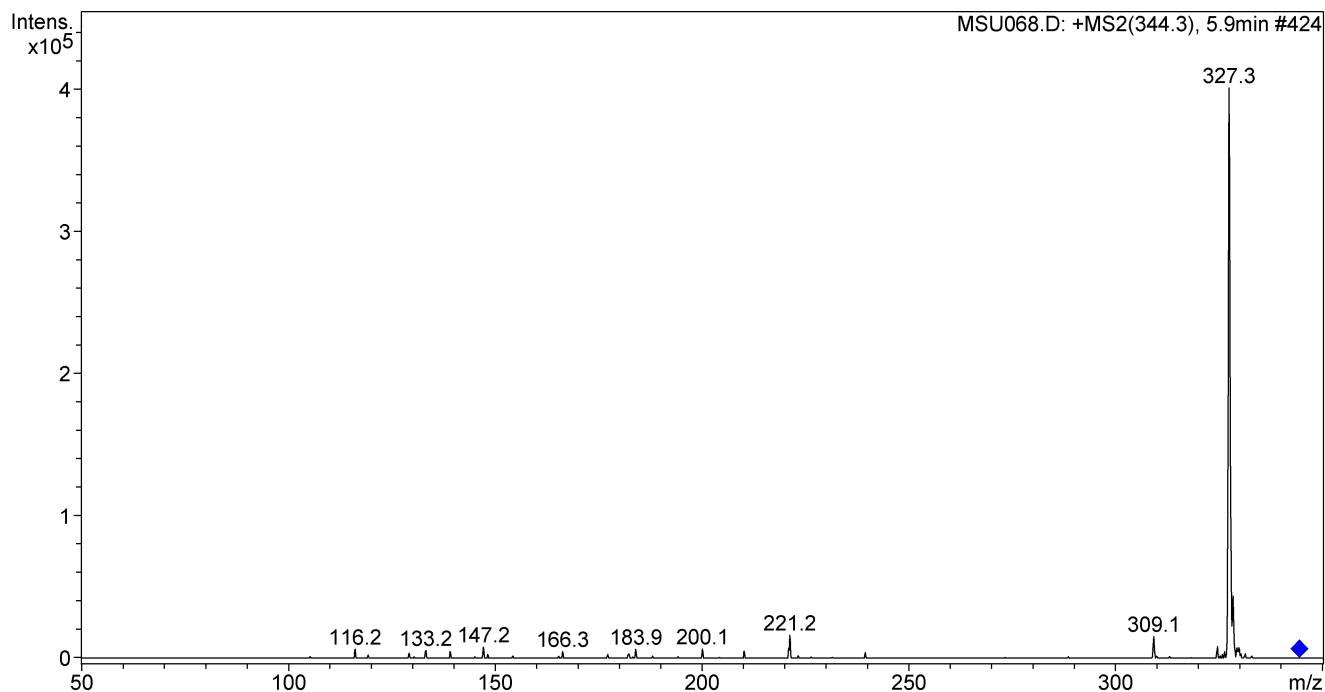

## Mass List:

| #  | m/z   | Res. | FWHM | I      | I %   | S/N   |
|----|-------|------|------|--------|-------|-------|
| 1  | 116.2 | 448  | 0.3  | 6026   | 1.5   | 4.4   |
| 2  | 119.3 | 512  | 0.2  | 2103   | 0.5   | 1.5   |
| 3  | 129.2 | 491  | 0.3  | 3341   | 0.8   | 2.5   |
| 4  | 133.2 | 385  | 0.3  | 5159   | 1.3   | 3.8   |
| 5  | 139.1 | 538  | 0.3  | 4570   | 1.1   | 3.4   |
| 6  | 147.2 | 525  | 0.3  | 7596   | 1.9   | 5.6   |
| 7  | 148.2 | 668  | 0.2  | 2605   | 0.7   | 1.9   |
| 8  | 166.3 | 702  | 0.2  | 4560   | 1.1   | 3.4   |
| 9  | 177.2 | 656  | 0.3  | 2439   | 0.6   | 1.8   |
| 10 | 182.3 | 411  | 0.4  | 2986   | 0.7   | 2.2   |
| 11 | 183.9 | 722  | 0.3  | 6104   | 1.5   | 4.5   |
| 12 | 188.0 | 770  | 0.2  | 1483   | 0.4   | 1.1   |
| 13 | 200.1 | 792  | 0.3  | 6309   | 1.6   | 4.6   |
| 14 | 210.2 | 805  | 0.3  | 4777   | 1.2   | 3.5   |
| 15 | 221.2 | 828  | 0.3  | 16056  | 4.0   | 11.8  |
| 16 | 223.2 | 958  | 0.2  | 1703   | 0.4   | 1.3   |
| 17 | 239.4 | 1050 | 0.2  | 3917   | 1.0   | 2.9   |
| 18 | 309.1 | 894  | 0.3  | 15026  | 3.8   | 11.1  |
| 19 | 309.8 | 1237 | 0.3  | 1477   | 0.4   | 1.1   |
| 20 | 324.5 | 1073 | 0.3  | 8053   | 2.0   | 5.9   |
| 21 | 325.1 | 1265 | 0.3  | 1492   | 0.4   | 1.1   |
| 22 | 325.7 | 1462 | 0.2  | 2604   | 0.6   | 1.9   |
| 23 | 326.2 | 1542 | 0.2  | 4648   | 1.2   | 3.4   |
| 24 | 327.3 | 733  | 0.4  | 400639 | 100.0 | 295.3 |
| 25 | 328.3 | 1041 | 0.3  | 43410  | 10.8  | 32.0  |

## Compound Mass Spectrum List Report - MS

---

| #  | m/z   | Res. | FWHM | I    | I % | S/N |
|----|-------|------|------|------|-----|-----|
| 26 | 329.2 | 1210 | 0.3  | 7184 | 1.8 | 5.3 |
| 27 | 329.7 | 1515 | 0.2  | 7260 | 1.8 | 5.4 |
| 28 | 330.1 | 1408 | 0.2  | 2858 | 0.7 | 2.1 |
| 29 | 331.2 | 1140 | 0.3  | 2948 | 0.7 | 2.2 |

# Compound Mass Spectrum List Report - MS

**+MS2(343.4),  
8.2min #592**

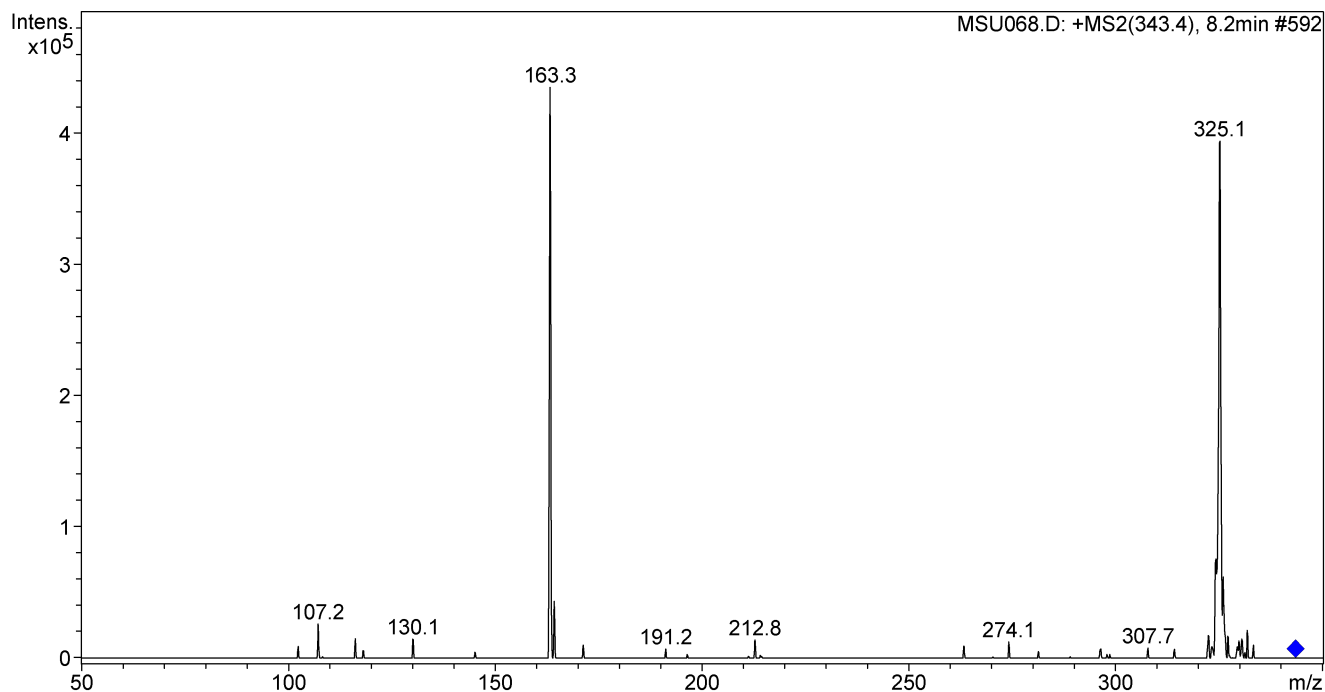

**Mass List:**

| #  | m/z   | Res. | FWHM | I      | I %   | S/N   |
|----|-------|------|------|--------|-------|-------|
| 1  | 102.4 | 424  | 0.2  | 8797   | 2.0   | 2.5   |
| 2  | 107.2 | 417  | 0.3  | 25804  | 5.9   | 7.4   |
| 3  | 116.2 | 520  | 0.2  | 14737  | 3.4   | 4.2   |
| 4  | 118.1 | 463  | 0.3  | 5707   | 1.3   | 1.6   |
| 5  | 130.1 | 505  | 0.3  | 14497  | 3.3   | 4.2   |
| 6  | 145.1 | 569  | 0.3  | 4363   | 1.0   | 1.3   |
| 7  | 163.3 | 432  | 0.4  | 434601 | 100.0 | 125.0 |
| 8  | 164.3 | 628  | 0.3  | 43310  | 10.0  | 12.5  |
| 9  | 171.3 | 674  | 0.3  | 9896   | 2.3   | 2.8   |
| 10 | 191.2 | 862  | 0.2  | 6773   | 1.6   | 1.9   |
| 11 | 212.8 | 825  | 0.3  | 13817  | 3.2   | 4.0   |
| 12 | 263.3 | 1011 | 0.3  | 9038   | 2.1   | 2.6   |
| 13 | 274.1 | 1200 | 0.2  | 12166  | 2.8   | 3.5   |
| 14 | 281.2 | 1135 | 0.2  | 4944   | 1.1   | 1.4   |
| 15 | 296.2 | 731  | 0.4  | 6994   | 1.6   | 2.0   |
| 16 | 307.7 | 1252 | 0.2  | 7489   | 1.7   | 2.2   |
| 17 | 314.1 | 1121 | 0.3  | 6520   | 1.5   | 1.9   |
| 18 | 322.3 | 817  | 0.4  | 17168  | 4.0   | 4.9   |
| 19 | 323.2 | 679  | 0.5  | 8620   | 2.0   | 2.5   |
| 20 | 324.1 | 943  | 0.3  | 75469  | 17.4  | 21.7  |
| 21 | 325.1 | 681  | 0.5  | 393544 | 90.6  | 113.2 |
| 22 | 325.9 | 949  | 0.3  | 61747  | 14.2  | 17.8  |
| 23 | 327.0 | 1283 | 0.3  | 16724  | 3.8   | 4.8   |
| 24 | 329.3 | 1123 | 0.3  | 8479   | 2.0   | 2.4   |
| 25 | 329.7 | 1291 | 0.3  | 12896  | 3.0   | 3.7   |

## Compound Mass Spectrum List Report - MS

---

| #  | m/z   | Res. | FWHM | I     | I % | S/N |
|----|-------|------|------|-------|-----|-----|
| 26 | 330.4 | 878  | 0.4  | 14443 | 3.3 | 4.2 |
| 27 | 331.1 | 1403 | 0.2  | 4258  | 1.0 | 1.2 |
| 28 | 331.7 | 1400 | 0.2  | 21148 | 4.9 | 6.1 |
| 29 | 333.2 | 1320 | 0.3  | 9785  | 2.3 | 2.8 |

# Compound Mass Spectrum List Report - MS

**+MS2(341.0),  
9.1min #654**

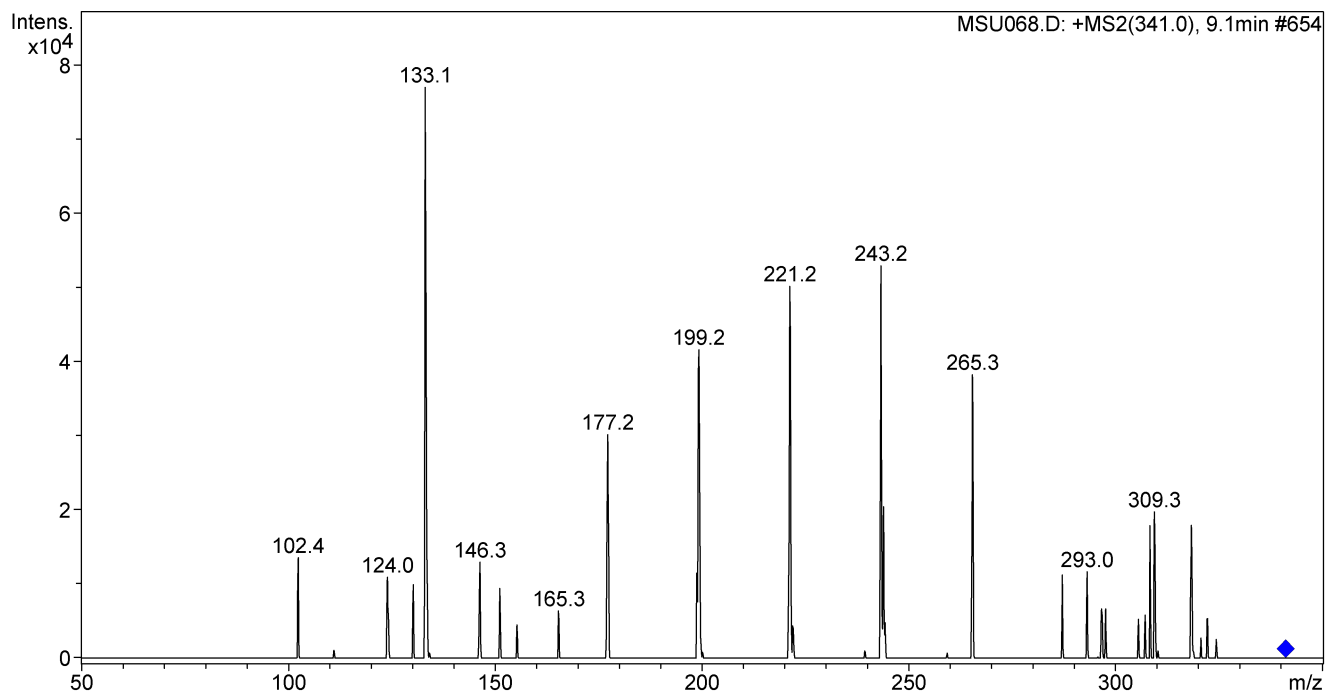

**Mass List:**

| #  | m/z   | Res. | FWHM | I     | I %   | S/N  |
|----|-------|------|------|-------|-------|------|
| 1  | 102.4 | 413  | 0.2  | 13535 | 17.6  | 4.0  |
| 2  | 124.0 | 330  | 0.4  | 10906 | 14.2  | 3.2  |
| 3  | 130.2 | 532  | 0.2  | 9892  | 12.9  | 2.9  |
| 4  | 133.1 | 368  | 0.4  | 76935 | 100.0 | 22.6 |
| 5  | 146.3 | 510  | 0.3  | 12934 | 16.8  | 3.8  |
| 6  | 151.1 | 618  | 0.2  | 9376  | 12.2  | 2.8  |
| 7  | 155.3 | 608  | 0.3  | 4447  | 5.8   | 1.3  |
| 8  | 165.3 | 695  | 0.2  | 6368  | 8.3   | 1.9  |
| 9  | 177.2 | 449  | 0.4  | 30110 | 39.1  | 8.8  |
| 10 | 198.7 | 1311 | 0.2  | 11447 | 14.9  | 3.4  |
| 11 | 199.2 | 482  | 0.4  | 41555 | 54.0  | 12.2 |
| 12 | 221.2 | 621  | 0.4  | 50107 | 65.1  | 14.7 |
| 13 | 221.9 | 636  | 0.3  | 4308  | 5.6   | 1.3  |
| 14 | 243.2 | 903  | 0.3  | 52873 | 68.7  | 15.5 |
| 15 | 243.8 | 981  | 0.2  | 20402 | 26.5  | 6.0  |
| 16 | 265.3 | 962  | 0.3  | 38191 | 49.6  | 11.2 |
| 17 | 287.0 | 1282 | 0.2  | 11208 | 14.6  | 3.3  |
| 18 | 293.0 | 1253 | 0.2  | 11612 | 15.1  | 3.4  |
| 19 | 296.5 | 717  | 0.4  | 6596  | 8.6   | 1.9  |
| 20 | 297.5 | 1195 | 0.2  | 6606  | 8.6   | 1.9  |
| 21 | 305.4 | 1365 | 0.2  | 5228  | 6.8   | 1.5  |
| 22 | 307.0 | 1353 | 0.2  | 5791  | 7.5   | 1.7  |
| 23 | 308.2 | 1386 | 0.2  | 17861 | 23.2  | 5.2  |
| 24 | 309.3 | 912  | 0.3  | 19710 | 25.6  | 5.8  |
| 25 | 318.2 | 885  | 0.4  | 17888 | 23.3  | 5.3  |

# Compound Mass Spectrum List Report - MS

---

| #  | m/z   | Res. | FWHM | I    | I % | S/N |
|----|-------|------|------|------|-----|-----|
| 26 | 322.1 | 1238 | 0.3  | 5323 | 6.9 | 1.6 |

# Compound Mass Spectrum List Report - MS

**+MS2(293.6),  
13.5min #980**

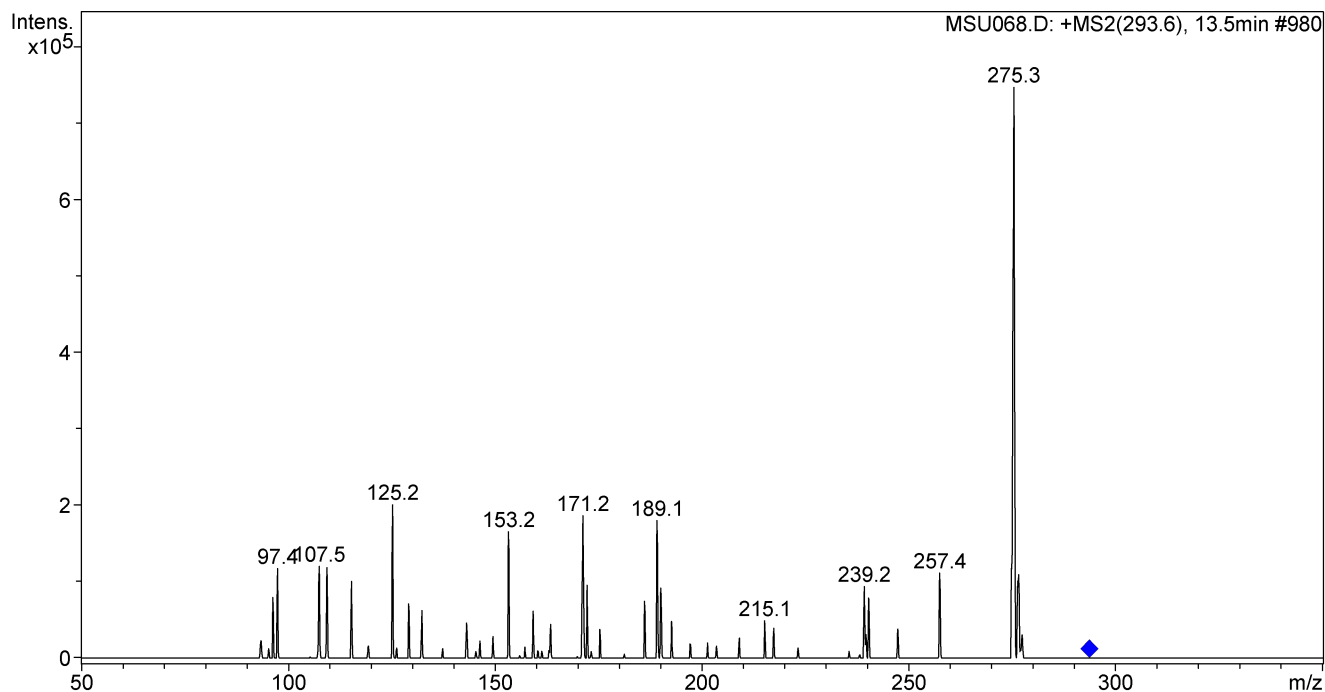

**Mass List:**

| #  | m/z   | Res. | FWHM | I      | I %  | S/N  |
|----|-------|------|------|--------|------|------|
| 1  | 96.3  | 424  | 0.2  | 79437  | 10.6 | 4.4  |
| 2  | 97.4  | 408  | 0.2  | 117022 | 15.7 | 6.5  |
| 3  | 107.5 | 390  | 0.3  | 120144 | 16.1 | 6.7  |
| 4  | 109.4 | 404  | 0.3  | 118392 | 15.9 | 6.6  |
| 5  | 115.3 | 460  | 0.3  | 100443 | 13.5 | 5.6  |
| 6  | 125.2 | 493  | 0.3  | 200409 | 26.9 | 11.1 |
| 7  | 129.1 | 533  | 0.2  | 70956  | 9.5  | 3.9  |
| 8  | 132.3 | 514  | 0.3  | 62030  | 8.3  | 3.4  |
| 9  | 143.1 | 470  | 0.3  | 45586  | 6.1  | 2.5  |
| 10 | 153.2 | 608  | 0.3  | 165170 | 22.1 | 9.2  |
| 11 | 159.2 | 627  | 0.3  | 61216  | 8.2  | 3.4  |
| 12 | 163.4 | 720  | 0.2  | 44128  | 5.9  | 2.4  |
| 13 | 171.2 | 520  | 0.3  | 185970 | 24.9 | 10.3 |
| 14 | 172.2 | 775  | 0.2  | 95163  | 12.7 | 5.3  |
| 15 | 175.3 | 783  | 0.2  | 37250  | 5.0  | 2.1  |
| 16 | 186.1 | 782  | 0.2  | 74420  | 10.0 | 4.1  |
| 17 | 189.1 | 705  | 0.3  | 179683 | 24.1 | 10.0 |
| 18 | 190.0 | 602  | 0.3  | 91311  | 12.2 | 5.1  |
| 19 | 192.6 | 783  | 0.2  | 47961  | 6.4  | 2.7  |
| 20 | 215.1 | 903  | 0.2  | 48820  | 6.5  | 2.7  |
| 21 | 217.3 | 888  | 0.2  | 39069  | 5.2  | 2.2  |
| 22 | 239.2 | 942  | 0.3  | 93508  | 12.5 | 5.2  |
| 23 | 239.6 | 1349 | 0.2  | 30718  | 4.1  | 1.7  |
| 24 | 240.3 | 919  | 0.3  | 78569  | 10.5 | 4.4  |
| 25 | 247.3 | 923  | 0.3  | 37783  | 5.1  | 2.1  |

## Compound Mass Spectrum List Report - MS

---

| #  | m/z   | Res. | FWHM | I      | I %   | S/N  |
|----|-------|------|------|--------|-------|------|
| 26 | 257.4 | 831  | 0.3  | 111114 | 14.9  | 6.2  |
| 27 | 275.3 | 571  | 0.5  | 746385 | 100.0 | 41.4 |
| 28 | 276.3 | 504  | 0.5  | 100495 | 13.5  | 5.6  |
| 29 | 276.4 | 520  | 0.5  | 109061 | 14.6  | 6.1  |
| 30 | 277.3 | 813  | 0.3  | 30378  | 4.1   | 1.7  |



# Compound Mass Spectrum List Report - MS

+MS2(313.7),  
14.3min #1046

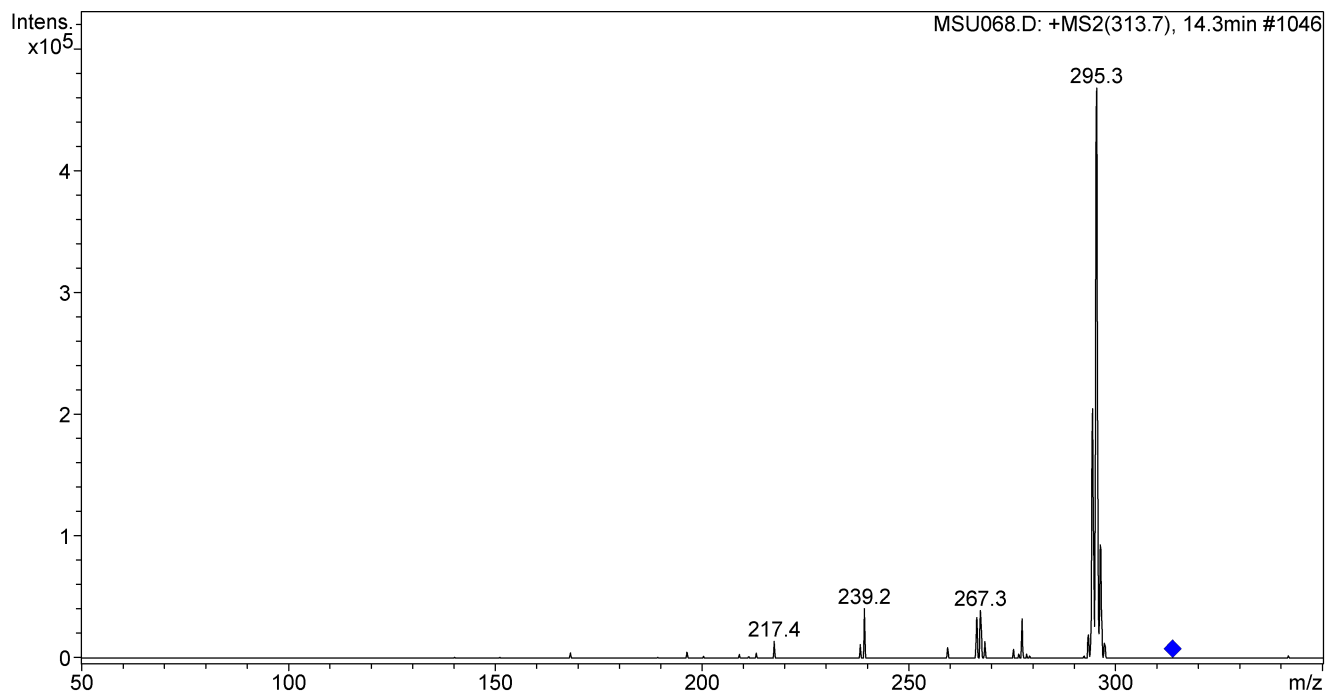

## Mass List:

| #  | m/z   | Res. | FWHM | I      | I %   | S/N   |
|----|-------|------|------|--------|-------|-------|
| 1  | 168.2 | 687  | 0.2  | 4247   | 0.9   | 1.1   |
| 2  | 196.3 | 772  | 0.3  | 4885   | 1.0   | 1.2   |
| 3  | 213.1 | 866  | 0.2  | 4118   | 0.9   | 1.0   |
| 4  | 217.4 | 981  | 0.2  | 13773  | 2.9   | 3.4   |
| 5  | 238.2 | 1059 | 0.2  | 11092  | 2.4   | 2.8   |
| 6  | 239.2 | 1047 | 0.2  | 40422  | 8.6   | 10.0  |
| 7  | 259.3 | 841  | 0.3  | 8386   | 1.8   | 2.1   |
| 8  | 266.4 | 832  | 0.3  | 33125  | 7.1   | 8.2   |
| 9  | 267.3 | 643  | 0.4  | 38923  | 8.3   | 9.7   |
| 10 | 268.3 | 1087 | 0.2  | 13362  | 2.9   | 3.3   |
| 11 | 275.2 | 1189 | 0.2  | 7103   | 1.5   | 1.8   |
| 12 | 277.3 | 988  | 0.3  | 32031  | 6.8   | 8.0   |
| 13 | 293.3 | 878  | 0.3  | 19028  | 4.1   | 4.7   |
| 14 | 294.3 | 734  | 0.4  | 204529 | 43.7  | 50.8  |
| 15 | 295.3 | 641  | 0.5  | 467778 | 100.0 | 116.3 |
| 16 | 296.2 | 772  | 0.4  | 92880  | 19.9  | 23.1  |
| 17 | 297.2 | 686  | 0.4  | 12108  | 2.6   | 3.0   |

# Compound Mass Spectrum List Report - MS

+MS2(290.5),  
14.7min #1078

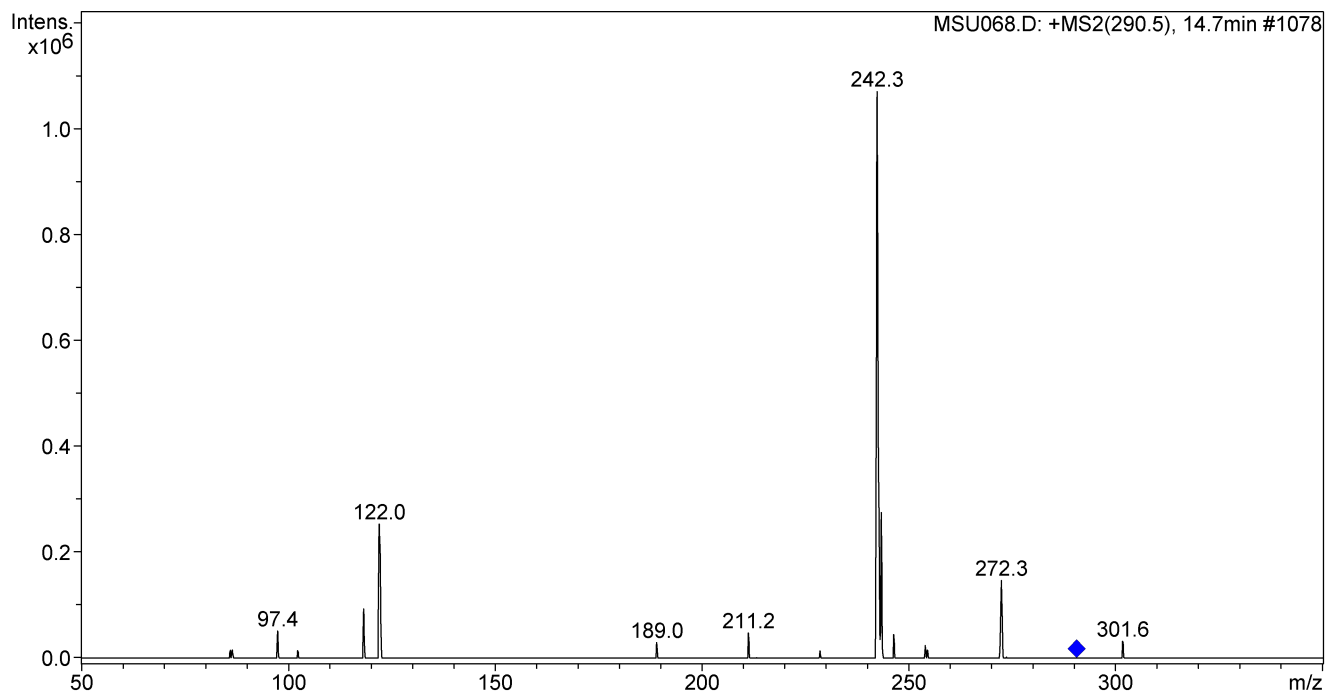

## Mass List:

| #  | m/z   | Res. | FWHM | I       | I %   | S/N  |
|----|-------|------|------|---------|-------|------|
| 1  | 97.4  | 377  | 0.3  | 50818   | 4.7   | 1.9  |
| 2  | 118.2 | 464  | 0.3  | 92802   | 8.7   | 3.5  |
| 3  | 122.0 | 248  | 0.5  | 253340  | 23.7  | 9.6  |
| 4  | 189.0 | 766  | 0.2  | 29059   | 2.7   | 1.1  |
| 5  | 211.2 | 935  | 0.2  | 47544   | 4.4   | 1.8  |
| 6  | 242.3 | 602  | 0.4  | 1069904 | 100.0 | 40.4 |
| 7  | 243.3 | 1008 | 0.2  | 275159  | 25.7  | 10.4 |
| 8  | 246.3 | 1081 | 0.2  | 44240   | 4.1   | 1.7  |
| 9  | 272.3 | 733  | 0.4  | 146886  | 13.7  | 5.5  |
| 10 | 301.6 | 1185 | 0.3  | 31549   | 2.9   | 1.2  |

# Display Report - Selected Window Selected

**Analysis Name** MSU069.D  
**Method:** GENERA~4.M  
**Sample Na** TPQ-2-20  
**Analysis Inf**

**Instrume** LC-MSD-Trap-SL  
**Operator:** Pablo

**Print Da** 03/07/2 03:37:27  
**Acq. Dat** 02/27/2011  
01:26:16 PM

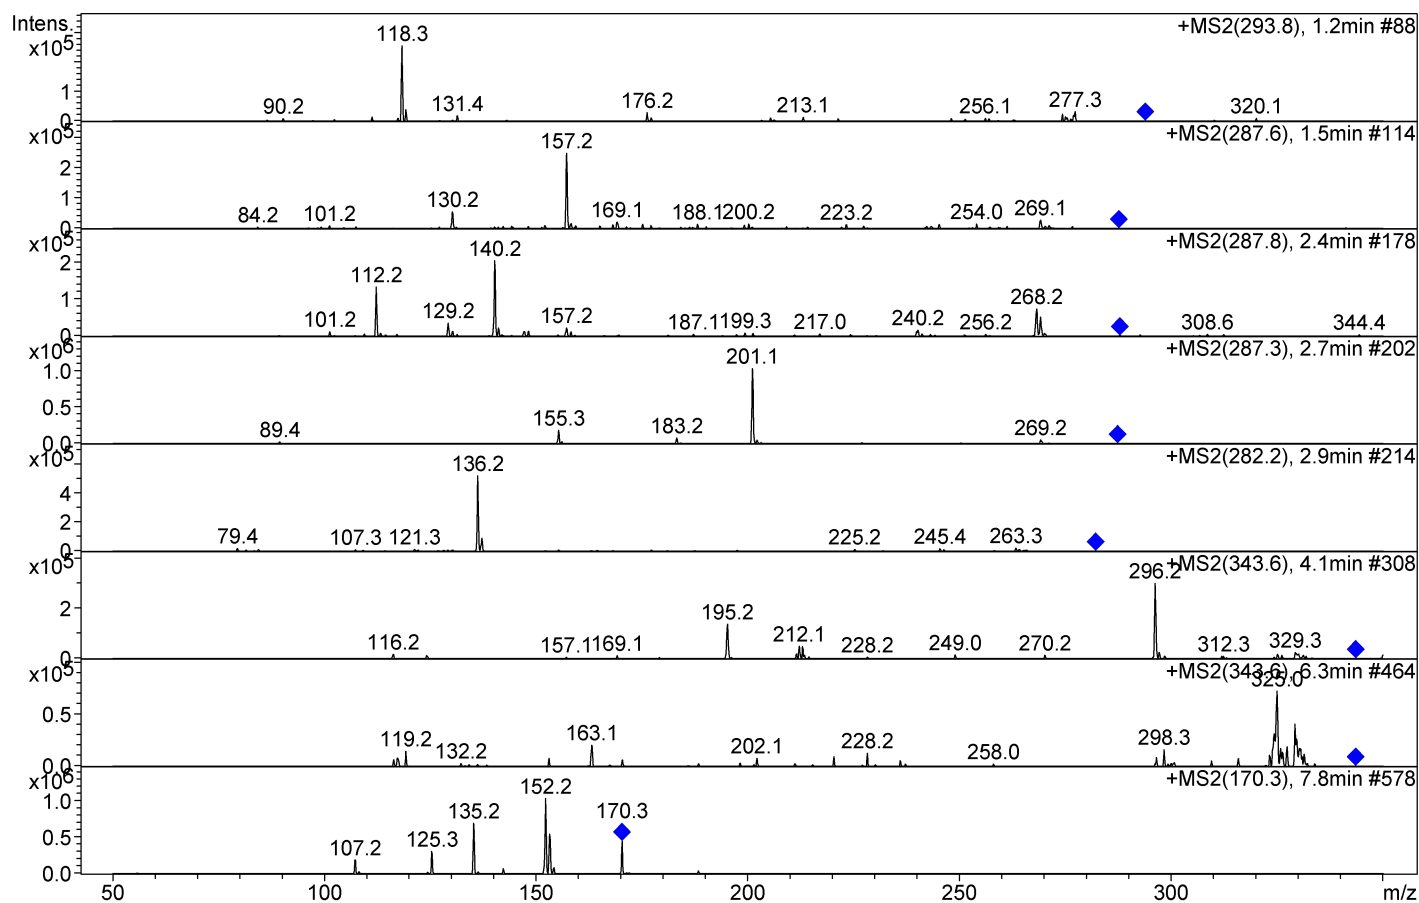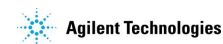

# Display Report - Selected Window Selected

**Analysis Name** MSU069.D  
**Method:** GENERA~4.M  
**Sample Na** TPQ-2-20  
**Analysis Inf**

**Instrume** LC-MSD-Trap-SL  
**Operator:** Pablo

**Print Da** 03/07/2 03:37:50  
**Acq. Dat** 03/27/2011  
01:26:16 PM

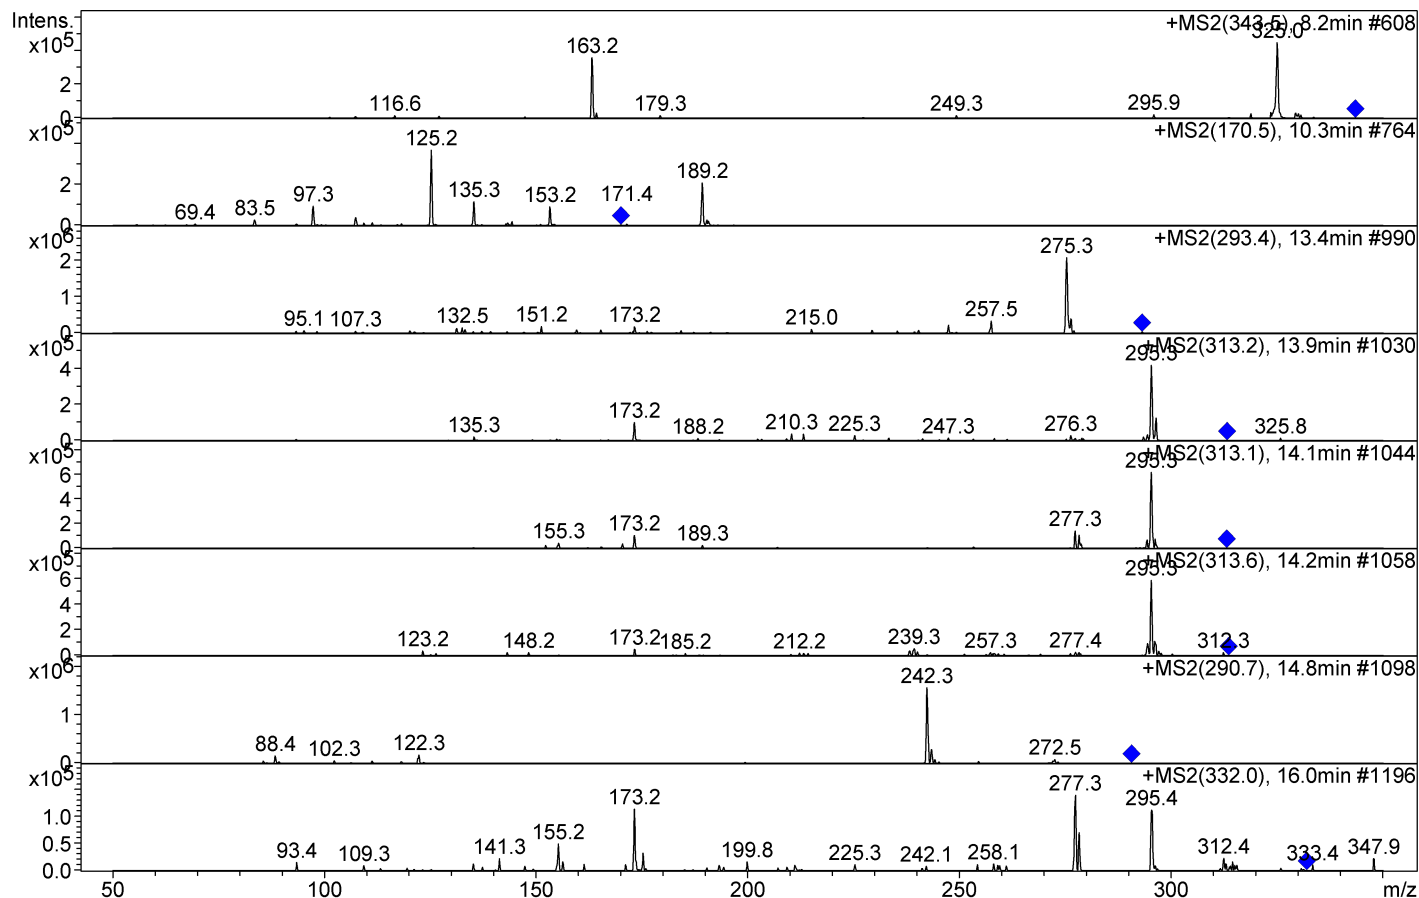

# Compound Mass Spectrum List Report - MS

**Analysis Name:** MSU069.D      **Instrument:** LC-MSD-Trap-SL      **Print Date:** 03/07/2019 03:36:14 PM  
**Method:** GENERA~4.M      **Operator:** Pablo      **Acq. Date:** 02/27/2019 01:26:16 PM  
**Sample Name:** TPQ-2-20  
**Analysis Info:**

## Acquisition Parameter:

|                 |             |                       |            |                |           |
|-----------------|-------------|-----------------------|------------|----------------|-----------|
| Mass Range Mode | Std/Normal  | Trap Drive            | 49.6       | Scan Begin     | 50 m/z    |
| Ion Polarity    | Positive    | Octopole RF Amplitude | 120.0 Vpp  | Scan End       | 350 m/z   |
| Ion Source Type | ESI         | Capillary Exit        | 106.0 Volt | Averages       | 4 Spectra |
| Dry Temp (Set)  | 350 °C      | Skimmer               | 40.0 Volt  | Max. Accu Time | 200000 µs |
| Nebulizer (Set) | 70.00 psi   | Oct 1 DC              | 12.00 Volt | ICC Target     | 30000     |
| Dry Gas (Set)   | 12.00 l/min | Oct 2 DC              | 1.70 Volt  | Charge Control | on        |

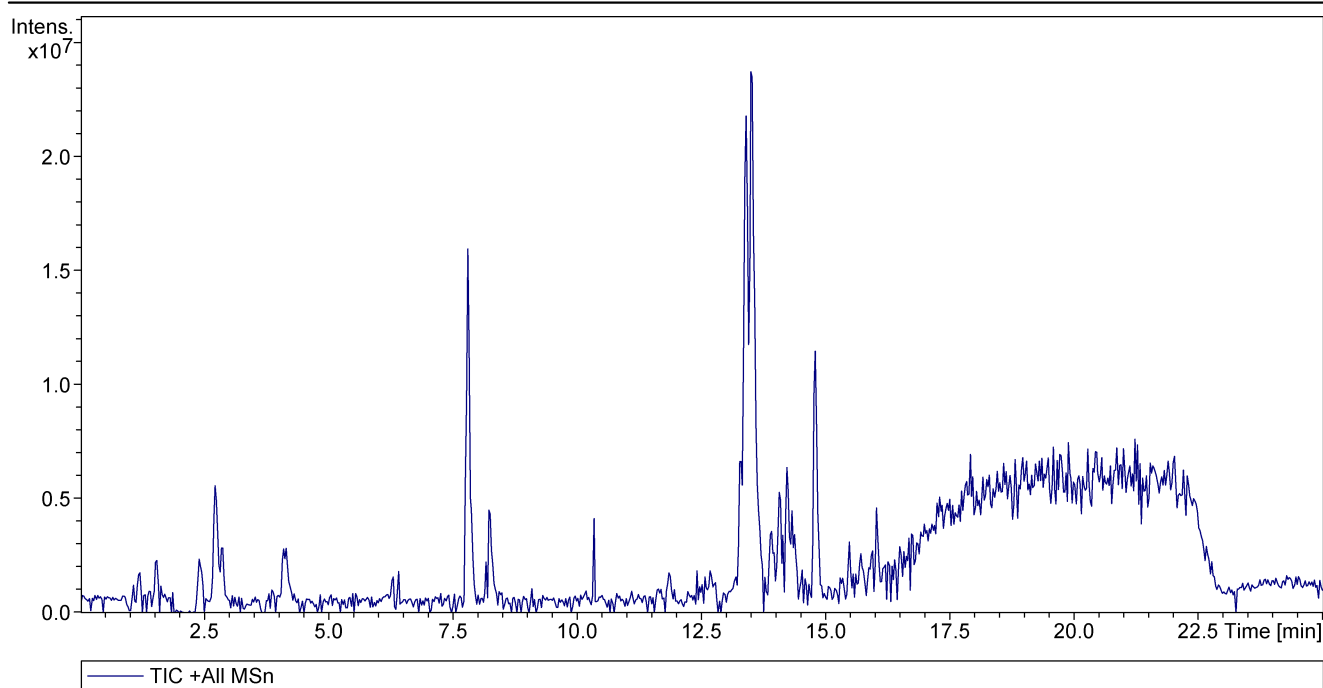

## Compound List:

| #    | RT [min] | Range [min] | Height | Area | Area Frac % |
|------|----------|-------------|--------|------|-------------|
| n.a. | 1.2      | 1.2         | n.a.   | n.a. | n.a.        |
| n.a. | 1.5      | 1.5         | n.a.   | n.a. | n.a.        |
| n.a. | 2.4      | 2.4         | n.a.   | n.a. | n.a.        |
| n.a. | 2.7      | 2.7         | n.a.   | n.a. | n.a.        |
| n.a. | 2.9      | 2.9         | n.a.   | n.a. | n.a.        |
| n.a. | 4.1      | 4.1         | n.a.   | n.a. | n.a.        |
| n.a. | 6.3      | 6.3         | n.a.   | n.a. | n.a.        |
| n.a. | 7.8      | 7.8         | n.a.   | n.a. | n.a.        |
| n.a. | 8.2      | 8.2         | n.a.   | n.a. | n.a.        |
| n.a. | 10.3     | 10.3        | n.a.   | n.a. | n.a.        |

# Compound Mass Spectrum List Report - MS

---

| #    | RT [min] | Range [min] | Height | Area | Area Frac % |
|------|----------|-------------|--------|------|-------------|
| n.a. | 13.4     | 13.4        | n.a.   | n.a. | n.a.        |
| n.a. | 13.9     | 13.9        | n.a.   | n.a. | n.a.        |
| n.a. | 14.1     | 14.1        | n.a.   | n.a. | n.a.        |
| n.a. | 14.2     | 14.2        | n.a.   | n.a. | n.a.        |
| n.a. | 14.8     | 14.8        | n.a.   | n.a. | n.a.        |
| n.a. | 16.0     | 16.0        | n.a.   | n.a. | n.a.        |

# Compound Mass Spectrum List Report - MS

**+MS2(293.8),  
1.2min #88**

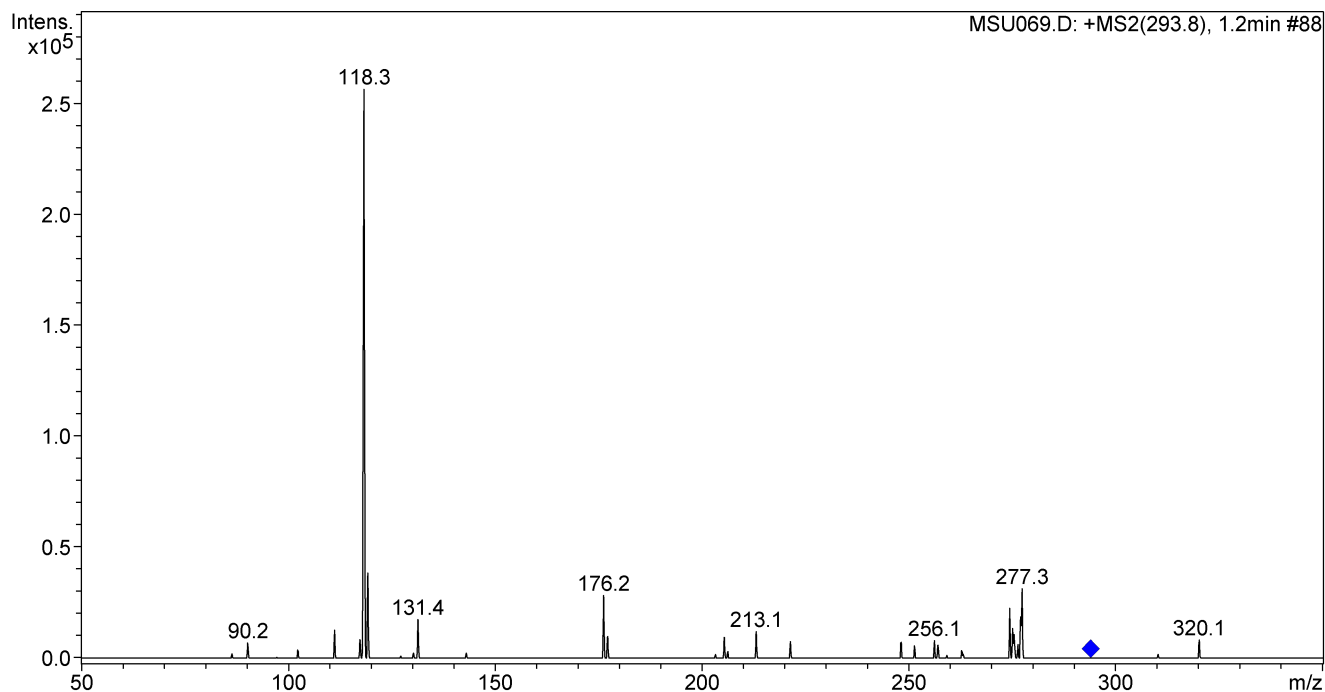

**Mass List:**

| #  | m/z   | Res. | FWHM | I      | I %   | S/N  |
|----|-------|------|------|--------|-------|------|
| 1  | 90.2  | 371  | 0.2  | 6768   | 2.6   | 1.8  |
| 2  | 111.2 | 501  | 0.2  | 12514  | 4.9   | 3.2  |
| 3  | 117.4 | 454  | 0.3  | 8267   | 3.2   | 2.1  |
| 4  | 118.3 | 368  | 0.3  | 256175 | 100.0 | 66.5 |
| 5  | 119.2 | 462  | 0.3  | 38213  | 14.9  | 9.9  |
| 6  | 131.4 | 503  | 0.3  | 17338  | 6.8   | 4.5  |
| 7  | 176.2 | 726  | 0.2  | 28127  | 11.0  | 7.3  |
| 8  | 177.2 | 677  | 0.3  | 9629   | 3.8   | 2.5  |
| 9  | 205.4 | 784  | 0.3  | 9289   | 3.6   | 2.4  |
| 10 | 213.1 | 826  | 0.3  | 11904  | 4.6   | 3.1  |
| 11 | 221.3 | 963  | 0.2  | 7423   | 2.9   | 1.9  |
| 12 | 248.1 | 956  | 0.3  | 7170   | 2.8   | 1.9  |
| 13 | 251.3 | 1106 | 0.2  | 5581   | 2.2   | 1.4  |
| 14 | 256.1 | 1151 | 0.2  | 7831   | 3.1   | 2.0  |
| 15 | 257.0 | 914  | 0.3  | 5811   | 2.3   | 1.5  |
| 16 | 274.3 | 1238 | 0.2  | 22402  | 8.7   | 5.8  |
| 17 | 275.0 | 1270 | 0.2  | 13311  | 5.2   | 3.5  |
| 18 | 275.4 | 1051 | 0.3  | 10632  | 4.2   | 2.8  |
| 19 | 276.3 | 1136 | 0.2  | 6048   | 2.4   | 1.6  |
| 20 | 277.0 | 1388 | 0.2  | 18526  | 7.2   | 4.8  |
| 21 | 277.3 | 1158 | 0.2  | 31160  | 12.2  | 8.1  |
| 22 | 320.1 | 1285 | 0.2  | 8042   | 3.1   | 2.1  |

# Compound Mass Spectrum List Report - MS

+MS2(287.6),  
1.5min #114

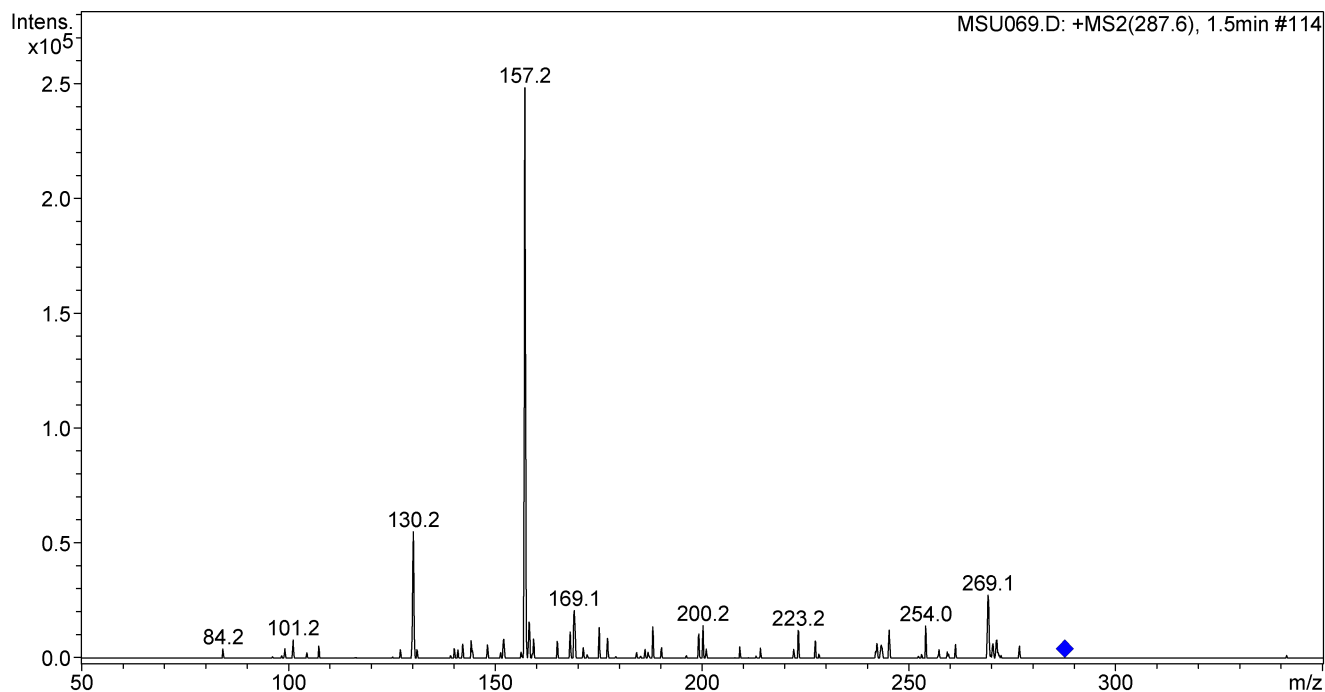

## Mass List:

| #  | m/z   | Res. | FWHM | I      | I %   | S/N   |
|----|-------|------|------|--------|-------|-------|
| 1  | 101.2 | 407  | 0.2  | 7783   | 3.1   | 3.5   |
| 2  | 107.4 | 486  | 0.2  | 5179   | 2.1   | 2.3   |
| 3  | 130.2 | 371  | 0.4  | 54962  | 22.2  | 24.4  |
| 4  | 142.2 | 553  | 0.3  | 6004   | 2.4   | 2.7   |
| 5  | 144.2 | 588  | 0.2  | 7482   | 3.0   | 3.3   |
| 6  | 148.1 | 578  | 0.3  | 5728   | 2.3   | 2.5   |
| 7  | 152.1 | 406  | 0.4  | 8131   | 3.3   | 3.6   |
| 8  | 157.2 | 456  | 0.3  | 248062 | 100.0 | 110.2 |
| 9  | 158.2 | 408  | 0.4  | 15576  | 6.3   | 6.9   |
| 10 | 159.3 | 633  | 0.3  | 8247   | 3.3   | 3.7   |
| 11 | 165.0 | 678  | 0.2  | 7335   | 3.0   | 3.3   |
| 12 | 168.1 | 646  | 0.3  | 11350  | 4.6   | 5.0   |
| 13 | 169.1 | 400  | 0.4  | 20662  | 8.3   | 9.2   |
| 14 | 175.1 | 726  | 0.2  | 13233  | 5.3   | 5.9   |
| 15 | 177.1 | 697  | 0.3  | 8589   | 3.5   | 3.8   |
| 16 | 188.1 | 776  | 0.2  | 13574  | 5.5   | 6.0   |
| 17 | 199.2 | 779  | 0.3  | 10464  | 4.2   | 4.7   |
| 18 | 200.2 | 876  | 0.2  | 14042  | 5.7   | 6.2   |
| 19 | 209.1 | 937  | 0.2  | 4906   | 2.0   | 2.2   |
| 20 | 223.2 | 864  | 0.3  | 11989  | 4.8   | 5.3   |
| 21 | 227.3 | 881  | 0.3  | 7420   | 3.0   | 3.3   |
| 22 | 242.2 | 804  | 0.3  | 6301   | 2.5   | 2.8   |
| 23 | 243.3 | 451  | 0.5  | 5655   | 2.3   | 2.5   |
| 24 | 245.2 | 788  | 0.3  | 12094  | 4.9   | 5.4   |
| 25 | 254.0 | 1115 | 0.2  | 13984  | 5.6   | 6.2   |



## Compound Mass Spectrum List Report - MS

---

| #  | m/z   | Res. | FWHM | I     | I %  | S/N  |
|----|-------|------|------|-------|------|------|
| 26 | 261.2 | 1162 | 0.2  | 5853  | 2.4  | 2.6  |
| 27 | 269.1 | 612  | 0.4  | 27328 | 11.0 | 12.1 |
| 28 | 270.2 | 768  | 0.4  | 6206  | 2.5  | 2.8  |
| 29 | 271.1 | 668  | 0.4  | 7811  | 3.1  | 3.5  |
| 30 | 276.7 | 1077 | 0.3  | 5168  | 2.1  | 2.3  |

# Compound Mass Spectrum List Report - MS

**+MS2(287.8),  
2.4min #178**

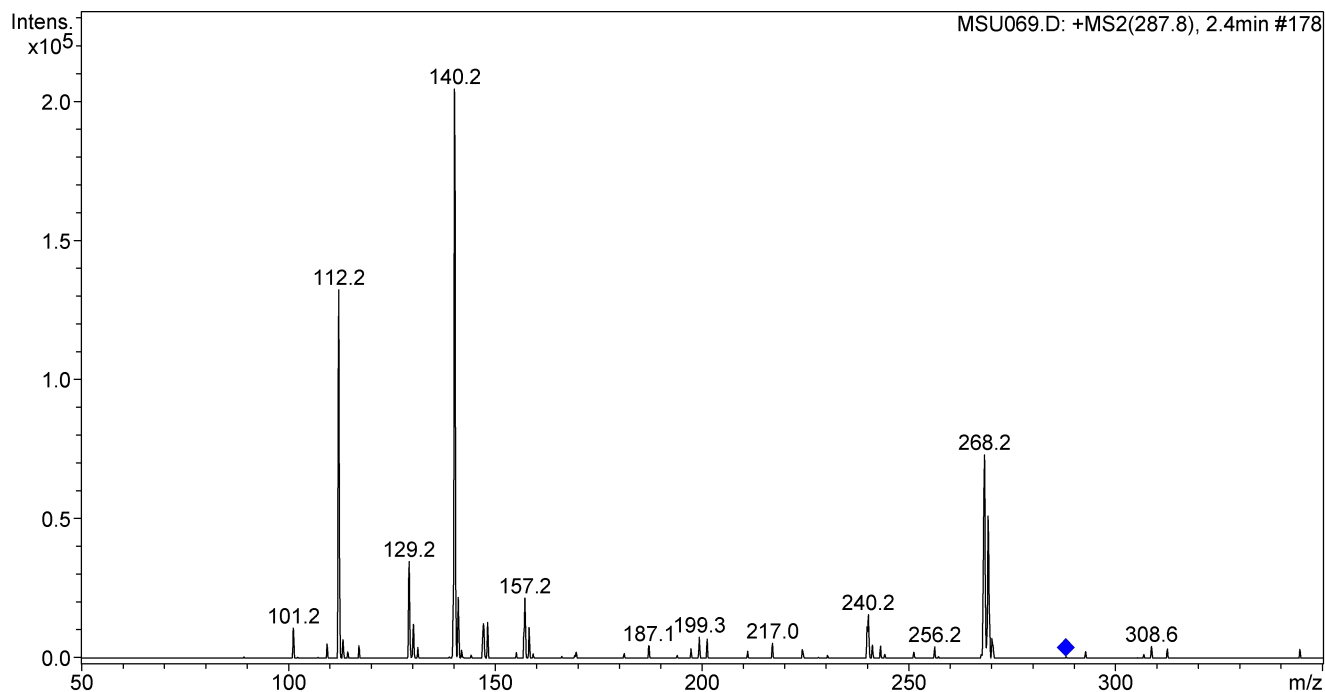

**Mass List:**

| #  | m/z   | Res. | FWHM | I      | I %   | S/N   |
|----|-------|------|------|--------|-------|-------|
| 1  | 101.2 | 390  | 0.3  | 10727  | 5.2   | 7.6   |
| 2  | 109.4 | 483  | 0.2  | 5053   | 2.5   | 3.6   |
| 3  | 112.2 | 371  | 0.3  | 132262 | 64.7  | 93.1  |
| 4  | 113.2 | 419  | 0.3  | 6585   | 3.2   | 4.6   |
| 5  | 117.1 | 526  | 0.2  | 4408   | 2.2   | 3.1   |
| 6  | 129.2 | 401  | 0.3  | 34643  | 17.0  | 24.4  |
| 7  | 130.3 | 452  | 0.3  | 12067  | 5.9   | 8.5   |
| 8  | 131.3 | 581  | 0.2  | 3813   | 1.9   | 2.7   |
| 9  | 140.2 | 426  | 0.3  | 204357 | 100.0 | 143.9 |
| 10 | 141.1 | 480  | 0.3  | 21721  | 10.6  | 15.3  |
| 11 | 147.2 | 347  | 0.4  | 12283  | 6.0   | 8.6   |
| 12 | 148.2 | 588  | 0.3  | 12850  | 6.3   | 9.0   |
| 13 | 157.2 | 438  | 0.4  | 21592  | 10.6  | 15.2  |
| 14 | 158.2 | 605  | 0.3  | 10952  | 5.4   | 7.7   |
| 15 | 187.1 | 728  | 0.3  | 4424   | 2.2   | 3.1   |
| 16 | 197.3 | 894  | 0.2  | 3349   | 1.6   | 2.4   |
| 17 | 199.3 | 823  | 0.2  | 7449   | 3.6   | 5.2   |
| 18 | 201.2 | 868  | 0.2  | 6862   | 3.4   | 4.8   |
| 19 | 217.0 | 874  | 0.2  | 5268   | 2.6   | 3.7   |
| 20 | 239.9 | 1248 | 0.2  | 11137  | 5.4   | 7.8   |
| 21 | 240.2 | 912  | 0.3  | 15585  | 7.6   | 11.0  |
| 22 | 241.1 | 947  | 0.3  | 4677   | 2.3   | 3.3   |
| 23 | 243.1 | 1044 | 0.2  | 4277   | 2.1   | 3.0   |
| 24 | 256.2 | 1020 | 0.3  | 4013   | 2.0   | 2.8   |
| 25 | 268.2 | 597  | 0.4  | 72957  | 35.7  | 51.4  |

## Compound Mass Spectrum List Report - MS

---

| #  | m/z   | Res. | FWHM | I     | I %  | S/N  |
|----|-------|------|------|-------|------|------|
| 26 | 269.1 | 821  | 0.3  | 51017 | 25.0 | 35.9 |
| 27 | 270.1 | 609  | 0.4  | 7035  | 3.4  | 5.0  |
| 28 | 308.6 | 1193 | 0.3  | 4159  | 2.0  | 2.9  |
| 29 | 312.4 | 1276 | 0.2  | 3218  | 1.6  | 2.3  |
| 30 | 344.4 | 1522 | 0.2  | 3077  | 1.5  | 2.2  |

# Compound Mass Spectrum List Report - MS

+MS2(287.3),  
2.7min #202

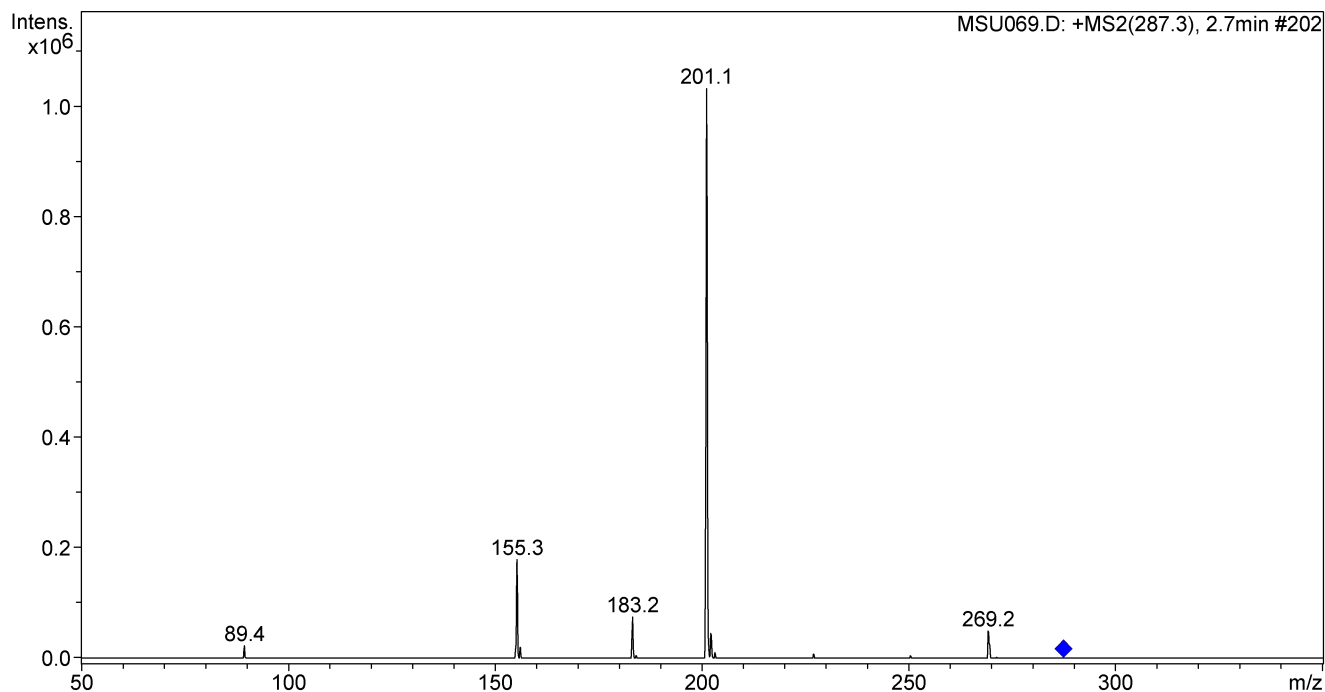

## Mass List:

| # | m/z   | Res. | FWHM | I       | I %   | S/N   |
|---|-------|------|------|---------|-------|-------|
| 1 | 89.4  | 386  | 0.2  | 21922   | 2.1   | 2.3   |
| 2 | 155.3 | 518  | 0.3  | 178260  | 17.3  | 18.7  |
| 3 | 156.1 | 574  | 0.3  | 19264   | 1.9   | 2.0   |
| 4 | 183.2 | 587  | 0.3  | 74271   | 7.2   | 7.8   |
| 5 | 201.1 | 577  | 0.3  | 1031404 | 100.0 | 108.4 |
| 6 | 202.1 | 610  | 0.3  | 44477   | 4.3   | 4.7   |
| 7 | 203.1 | 917  | 0.2  | 10100   | 1.0   | 1.1   |
| 8 | 269.2 | 631  | 0.4  | 48960   | 4.7   | 5.1   |

# Compound Mass Spectrum List Report - MS

+MS2(282.2),  
2.9min #214

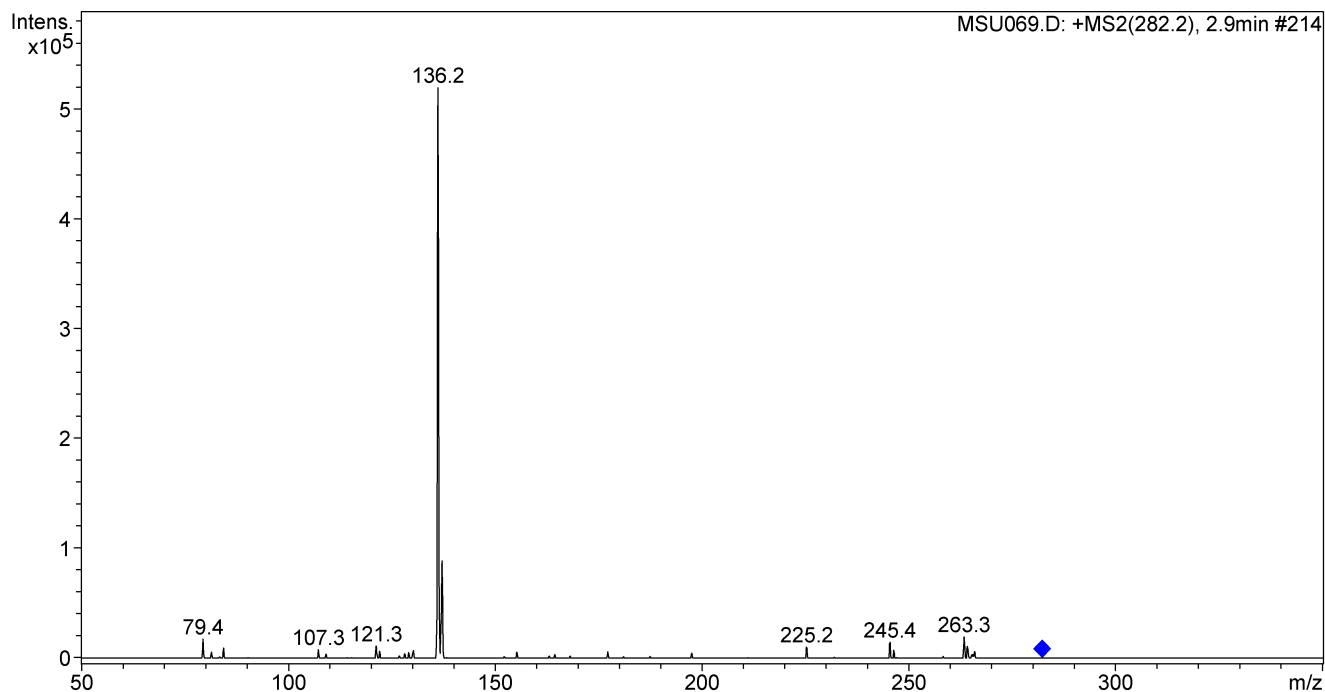

## Mass List:

| #  | m/z   | Res. | FWHM | I      | I %   | S/N   |
|----|-------|------|------|--------|-------|-------|
| 1  | 79.4  | 322  | 0.2  | 17204  | 3.3   | 5.6   |
| 2  | 81.5  | 323  | 0.3  | 5203   | 1.0   | 1.7   |
| 3  | 84.4  | 342  | 0.2  | 9022   | 1.7   | 3.0   |
| 4  | 107.3 | 451  | 0.2  | 7732   | 1.5   | 2.5   |
| 5  | 109.1 | 423  | 0.3  | 3573   | 0.7   | 1.2   |
| 6  | 121.3 | 455  | 0.3  | 10888  | 2.1   | 3.6   |
| 7  | 122.1 | 521  | 0.2  | 6214   | 1.2   | 2.0   |
| 8  | 128.1 | 504  | 0.3  | 3913   | 0.8   | 1.3   |
| 9  | 129.1 | 538  | 0.2  | 4901   | 0.9   | 1.6   |
| 10 | 130.2 | 380  | 0.3  | 6885   | 1.3   | 2.3   |
| 11 | 136.2 | 422  | 0.3  | 519055 | 100.0 | 169.8 |
| 12 | 137.2 | 438  | 0.3  | 88523  | 17.1  | 29.0  |
| 13 | 155.3 | 598  | 0.3  | 5166   | 1.0   | 1.7   |
| 14 | 164.4 | 724  | 0.2  | 3326   | 0.6   | 1.1   |
| 15 | 177.2 | 767  | 0.2  | 5547   | 1.1   | 1.8   |
| 16 | 197.5 | 782  | 0.3  | 4428   | 0.9   | 1.4   |
| 17 | 225.2 | 889  | 0.3  | 10001  | 1.9   | 3.3   |
| 18 | 245.4 | 922  | 0.3  | 14363  | 2.8   | 4.7   |
| 19 | 246.3 | 1113 | 0.2  | 7022   | 1.4   | 2.3   |
| 20 | 263.3 | 891  | 0.3  | 19194  | 3.7   | 6.3   |
| 21 | 264.1 | 765  | 0.3  | 10540  | 2.0   | 3.4   |
| 22 | 265.4 | 1410 | 0.2  | 3360   | 0.6   | 1.1   |
| 23 | 265.8 | 1110 | 0.2  | 5947   | 1.1   | 1.9   |

# Compound Mass Spectrum List Report - MS

**+MS2(343.6),  
4.1min #308**

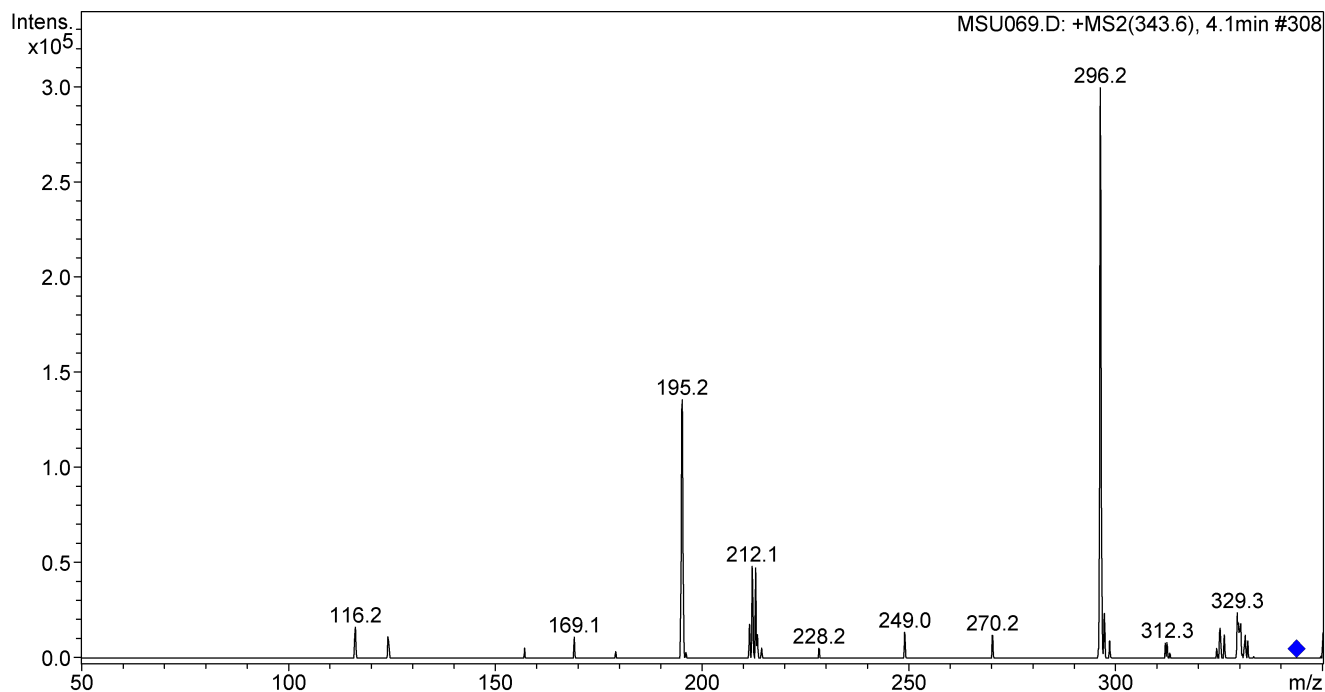

**Mass List:**

| #  | m/z   | Res. | FWHM | I      | I %   | S/N  |
|----|-------|------|------|--------|-------|------|
| 1  | 116.2 | 328  | 0.4  | 16207  | 5.4   | 3.6  |
| 2  | 124.1 | 298  | 0.4  | 11065  | 3.7   | 2.4  |
| 3  | 157.1 | 723  | 0.2  | 5216   | 1.7   | 1.1  |
| 4  | 169.1 | 760  | 0.2  | 10922  | 3.6   | 2.4  |
| 5  | 195.2 | 455  | 0.4  | 135514 | 45.3  | 29.7 |
| 6  | 211.5 | 786  | 0.3  | 17616  | 5.9   | 3.9  |
| 7  | 212.1 | 695  | 0.3  | 48199  | 16.1  | 10.6 |
| 8  | 212.9 | 970  | 0.2  | 47205  | 15.8  | 10.3 |
| 9  | 213.3 | 909  | 0.2  | 12271  | 4.1   | 2.7  |
| 10 | 214.4 | 856  | 0.3  | 5313   | 1.8   | 1.2  |
| 11 | 228.2 | 912  | 0.3  | 5147   | 1.7   | 1.1  |
| 12 | 249.0 | 957  | 0.3  | 13467  | 4.5   | 3.0  |
| 13 | 270.2 | 1032 | 0.3  | 11965  | 4.0   | 2.6  |
| 14 | 296.2 | 858  | 0.3  | 299393 | 100.0 | 65.6 |
| 15 | 297.2 | 1047 | 0.3  | 23476  | 7.8   | 5.1  |
| 16 | 298.5 | 1149 | 0.3  | 8918   | 3.0   | 2.0  |
| 17 | 311.9 | 1486 | 0.2  | 7833   | 2.6   | 1.7  |
| 18 | 312.3 | 1414 | 0.2  | 8064   | 2.7   | 1.8  |
| 19 | 324.3 | 1454 | 0.2  | 5020   | 1.7   | 1.1  |
| 20 | 325.1 | 842  | 0.4  | 15632  | 5.2   | 3.4  |
| 21 | 326.1 | 1268 | 0.3  | 12122  | 4.0   | 2.7  |
| 22 | 329.3 | 1684 | 0.2  | 23686  | 7.9   | 5.2  |
| 23 | 329.5 | 1866 | 0.2  | 18314  | 6.1   | 4.0  |
| 24 | 330.0 | 1284 | 0.3  | 17960  | 6.0   | 3.9  |
| 25 | 331.2 | 937  | 0.4  | 12042  | 4.0   | 2.6  |

# Compound Mass Spectrum List Report - MS

---

| #  | m/z   | Res. | FWHM | I    | I % | S/N |
|----|-------|------|------|------|-----|-----|
| 26 | 331.8 | 1475 | 0.2  | 8870 | 3.0 | 1.9 |

# Compound Mass Spectrum List Report - MS

**+MS2(343.6),  
6.3min #464**

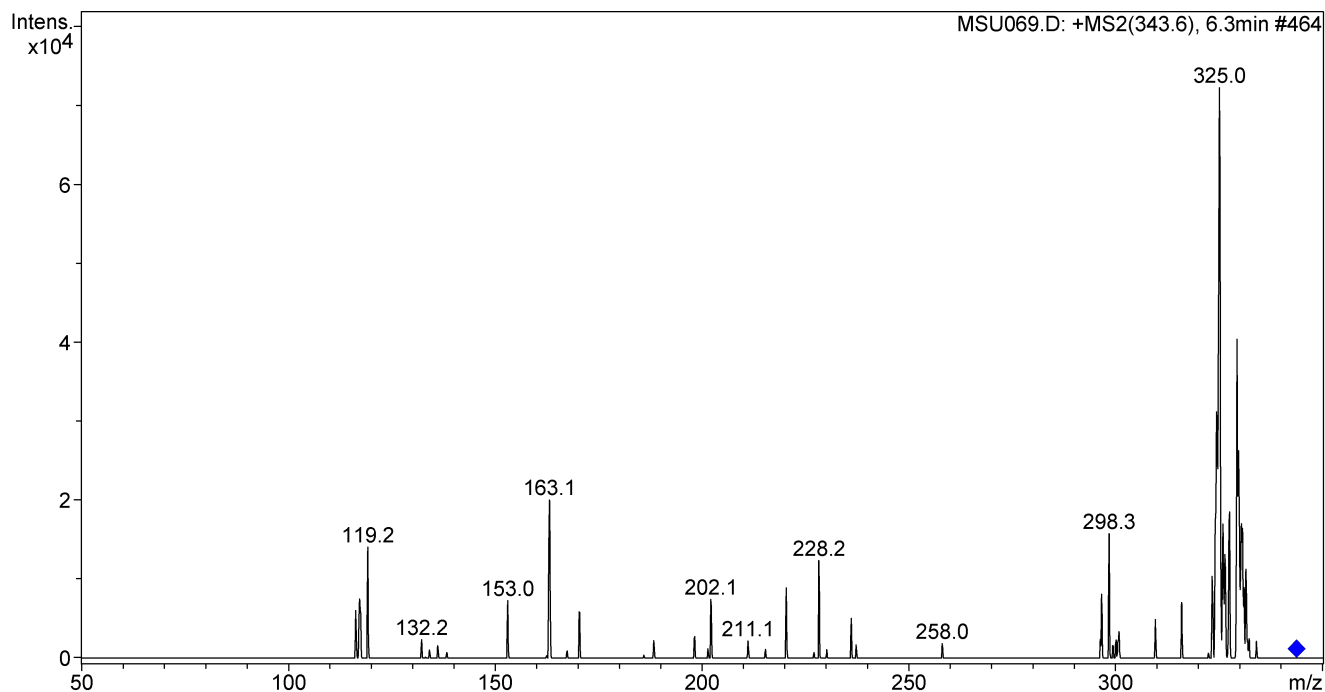

**Mass List:**

| #  | m/z   | Res. | FWHM | I     | I %   | S/N  |
|----|-------|------|------|-------|-------|------|
| 1  | 116.3 | 476  | 0.2  | 6013  | 8.3   | 3.5  |
| 2  | 117.3 | 237  | 0.5  | 7489  | 10.4  | 4.4  |
| 3  | 119.2 | 532  | 0.2  | 14050 | 19.5  | 8.2  |
| 4  | 132.2 | 585  | 0.2  | 2326  | 3.2   | 1.4  |
| 5  | 153.0 | 679  | 0.2  | 7274  | 10.1  | 4.2  |
| 6  | 163.1 | 429  | 0.4  | 20008 | 27.7  | 11.6 |
| 7  | 170.4 | 653  | 0.3  | 5854  | 8.1   | 3.4  |
| 8  | 198.2 | 774  | 0.3  | 2721  | 3.8   | 1.6  |
| 9  | 202.1 | 786  | 0.3  | 7452  | 10.3  | 4.3  |
| 10 | 220.3 | 990  | 0.2  | 8904  | 12.3  | 5.2  |
| 11 | 228.2 | 1017 | 0.2  | 12358 | 17.1  | 7.2  |
| 12 | 236.0 | 1054 | 0.2  | 5037  | 7.0   | 2.9  |
| 13 | 296.5 | 1296 | 0.2  | 8099  | 11.2  | 4.7  |
| 14 | 298.3 | 1224 | 0.2  | 15743 | 21.8  | 9.2  |
| 15 | 300.7 | 647  | 0.5  | 3318  | 4.6   | 1.9  |
| 16 | 309.5 | 1369 | 0.2  | 4875  | 6.7   | 2.8  |
| 17 | 315.9 | 1218 | 0.3  | 7038  | 9.7   | 4.1  |
| 18 | 323.3 | 1007 | 0.3  | 10351 | 14.3  | 6.0  |
| 19 | 324.3 | 656  | 0.5  | 31171 | 43.2  | 18.1 |
| 20 | 325.0 | 803  | 0.4  | 72233 | 100.0 | 42.0 |
| 21 | 325.8 | 1211 | 0.3  | 16976 | 23.5  | 9.9  |
| 22 | 326.3 | 1212 | 0.3  | 13095 | 18.1  | 7.6  |
| 23 | 327.4 | 949  | 0.3  | 18526 | 25.6  | 10.8 |
| 24 | 329.2 | 1350 | 0.2  | 40378 | 55.9  | 23.5 |
| 25 | 329.6 | 1418 | 0.2  | 26245 | 36.3  | 15.3 |



## Compound Mass Spectrum List Report - MS

---

| #  | m/z   | Res. | FWHM | I     | I %  | S/N |
|----|-------|------|------|-------|------|-----|
| 26 | 330.3 | 1512 | 0.2  | 17027 | 23.6 | 9.9 |
| 27 | 330.5 | 1569 | 0.2  | 16438 | 22.8 | 9.6 |
| 28 | 330.8 | 1978 | 0.2  | 8945  | 12.4 | 5.2 |
| 29 | 331.4 | 1097 | 0.3  | 11260 | 15.6 | 6.5 |
| 30 | 332.1 | 1484 | 0.2  | 2445  | 3.4  | 1.4 |

# Compound Mass Spectrum List Report - MS

+MS2(170.3),  
7.8min #578

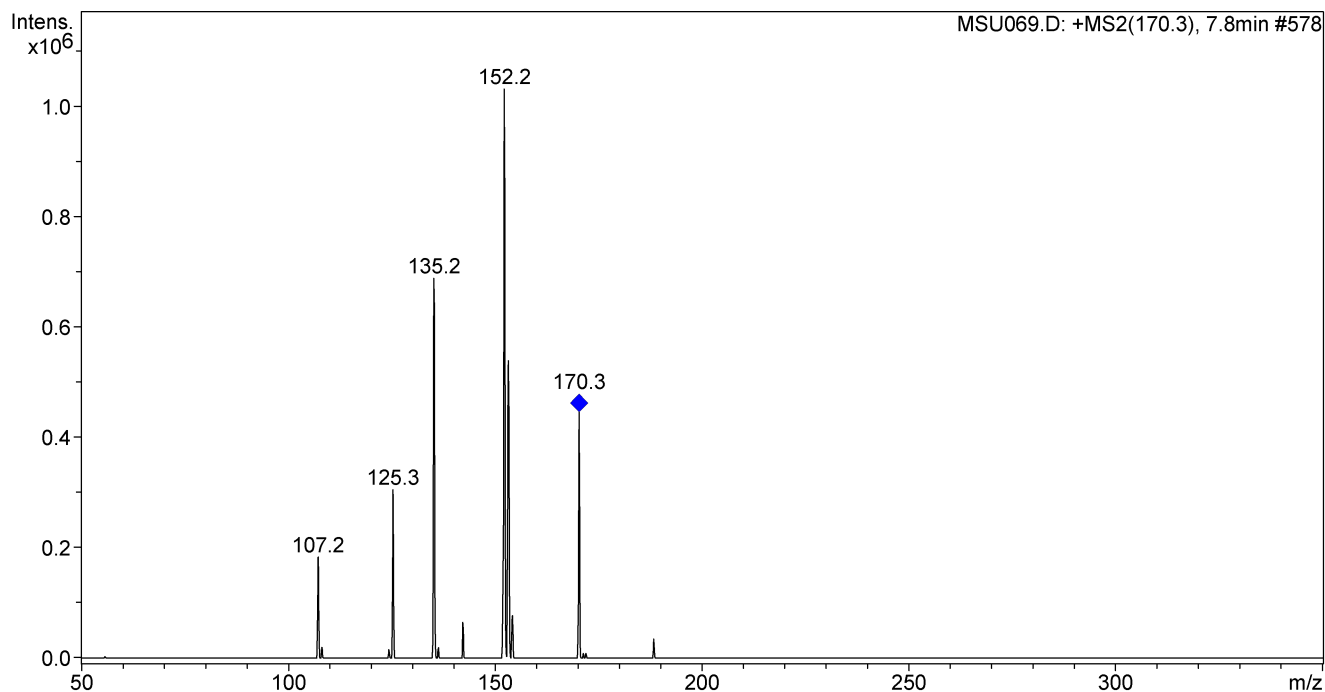

## Mass List:

| # | m/z   | Res. | FWHM | I       | I %   | S/N  |
|---|-------|------|------|---------|-------|------|
| 1 | 107.2 | 345  | 0.3  | 182914  | 17.7  | 3.3  |
| 2 | 125.3 | 463  | 0.3  | 304529  | 29.5  | 5.5  |
| 3 | 135.2 | 431  | 0.3  | 687989  | 66.7  | 12.4 |
| 4 | 142.2 | 604  | 0.2  | 64713   | 6.3   | 1.2  |
| 5 | 152.2 | 499  | 0.3  | 1030992 | 100.0 | 18.6 |
| 6 | 153.2 | 379  | 0.4  | 538583  | 52.2  | 9.7  |
| 7 | 154.1 | 447  | 0.3  | 76834   | 7.5   | 1.4  |
| 8 | 170.3 | 657  | 0.3  | 445135  | 43.2  | 8.0  |

# Compound Mass Spectrum List Report - MS

+MS2(343.5),  
8.2min #608

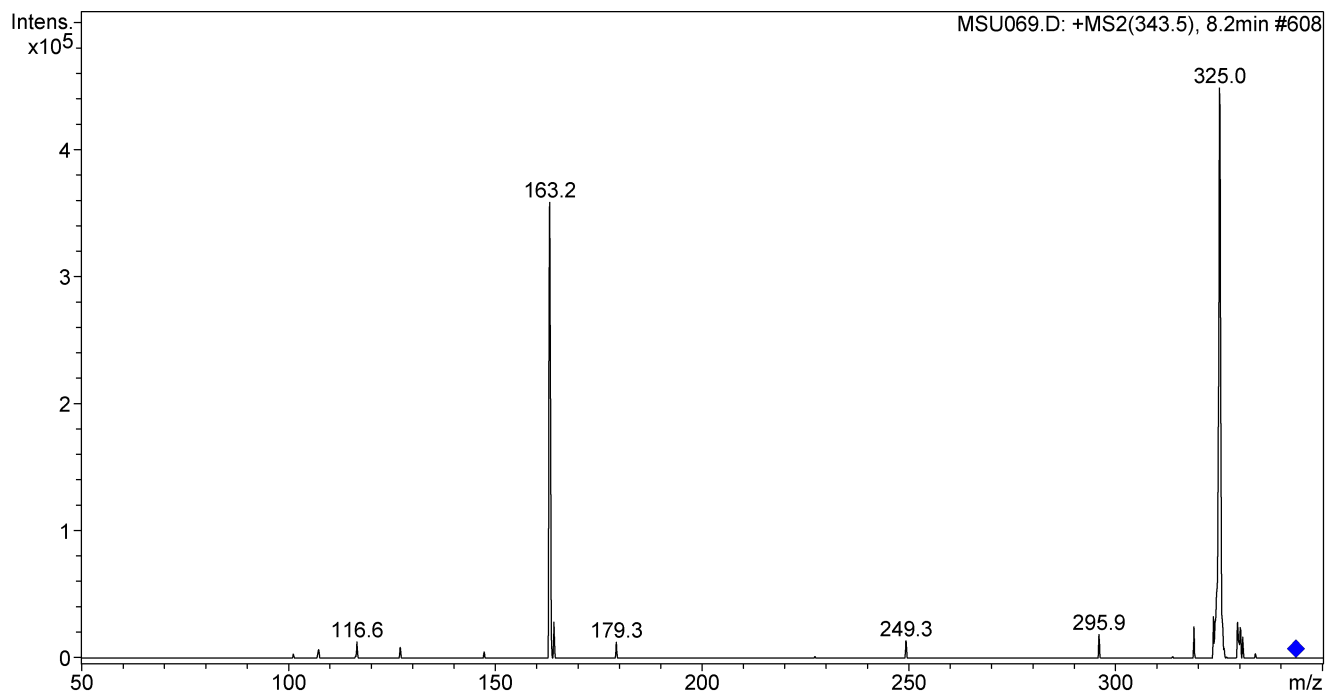

## Mass List:

| #  | m/z   | Res. | FWHM | I      | I %   | S/N  |
|----|-------|------|------|--------|-------|------|
| 1  | 107.3 | 277  | 0.4  | 6616   | 1.5   | 1.2  |
| 2  | 116.6 | 515  | 0.2  | 12706  | 2.8   | 2.3  |
| 3  | 127.1 | 491  | 0.3  | 8408   | 1.9   | 1.5  |
| 4  | 163.2 | 398  | 0.4  | 358318 | 79.9  | 65.2 |
| 5  | 164.2 | 701  | 0.2  | 28157  | 6.3   | 5.1  |
| 6  | 179.3 | 712  | 0.3  | 12496  | 2.8   | 2.3  |
| 7  | 249.3 | 949  | 0.3  | 13418  | 3.0   | 2.4  |
| 8  | 295.9 | 1211 | 0.2  | 18546  | 4.1   | 3.4  |
| 9  | 318.8 | 1420 | 0.2  | 24552  | 5.5   | 4.5  |
| 10 | 323.5 | 1495 | 0.2  | 32470  | 7.2   | 5.9  |
| 11 | 325.0 | 659  | 0.5  | 448229 | 100.0 | 81.6 |
| 12 | 329.4 | 1271 | 0.3  | 28136  | 6.3   | 5.1  |
| 13 | 330.0 | 1432 | 0.2  | 23908  | 5.3   | 4.4  |
| 14 | 330.6 | 1471 | 0.2  | 16465  | 3.7   | 3.0  |

# Compound Mass Spectrum List Report - MS

**+MS2(170.5),  
10.3min #764**

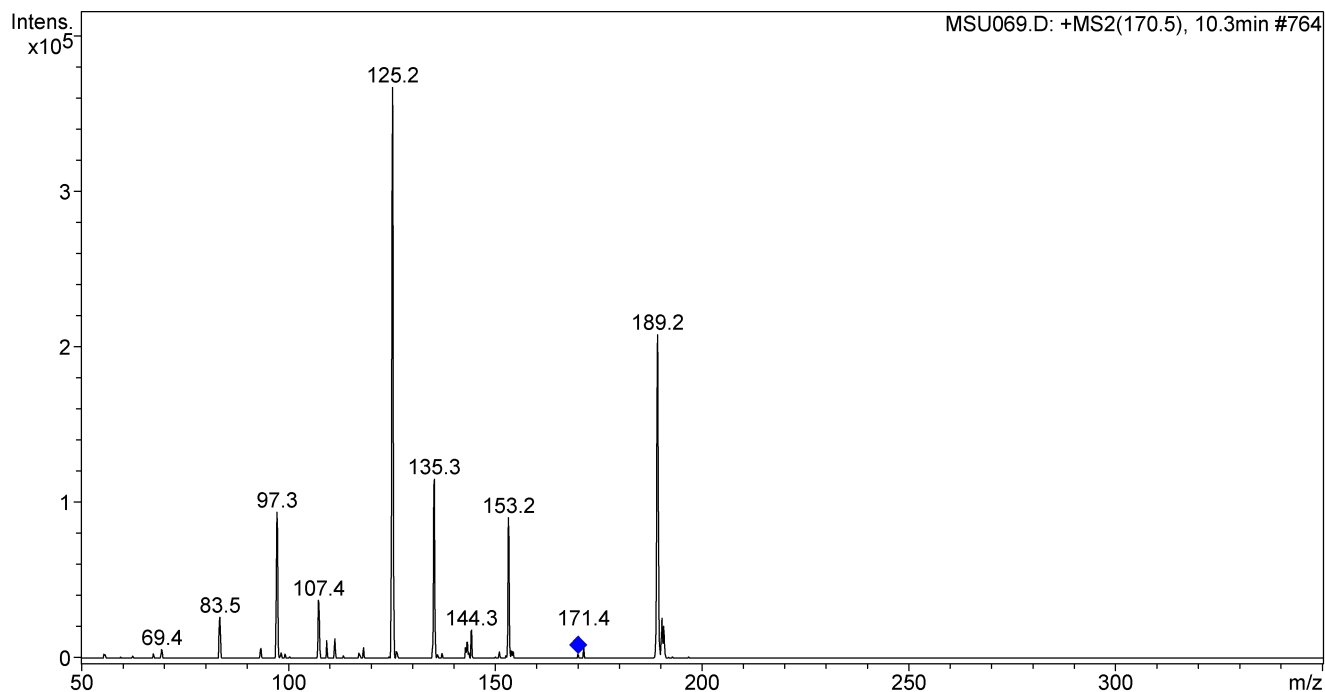

**Mass List:**

| #  | m/z   | Res. | FWHM | I      | I %   | S/N   |
|----|-------|------|------|--------|-------|-------|
| 1  | 55.5  | 116  | 0.5  | 2550   | 0.7   | 1.4   |
| 2  | 67.4  | 281  | 0.2  | 2680   | 0.7   | 1.4   |
| 3  | 69.4  | 217  | 0.3  | 5421   | 1.5   | 2.9   |
| 4  | 83.5  | 215  | 0.4  | 26157  | 7.1   | 14.0  |
| 5  | 93.4  | 287  | 0.3  | 6148   | 1.7   | 3.3   |
| 6  | 97.3  | 254  | 0.4  | 93612  | 25.5  | 50.1  |
| 7  | 98.3  | 369  | 0.3  | 3343   | 0.9   | 1.8   |
| 8  | 99.2  | 398  | 0.2  | 2461   | 0.7   | 1.3   |
| 9  | 107.4 | 271  | 0.4  | 37176  | 10.1  | 19.9  |
| 10 | 109.3 | 487  | 0.2  | 11086  | 3.0   | 5.9   |
| 11 | 111.3 | 420  | 0.3  | 12321  | 3.4   | 6.6   |
| 12 | 117.1 | 285  | 0.4  | 3124   | 0.9   | 1.7   |
| 13 | 118.2 | 500  | 0.2  | 6700   | 1.8   | 3.6   |
| 14 | 125.2 | 334  | 0.4  | 366580 | 100.0 | 196.2 |
| 15 | 126.2 | 287  | 0.4  | 4111   | 1.1   | 2.2   |
| 16 | 135.3 | 421  | 0.3  | 114894 | 31.3  | 61.5  |
| 17 | 137.2 | 541  | 0.3  | 3000   | 0.8   | 1.6   |
| 18 | 142.9 | 636  | 0.2  | 6545   | 1.8   | 3.5   |
| 19 | 143.2 | 578  | 0.2  | 10175  | 2.8   | 5.4   |
| 20 | 143.6 | 605  | 0.2  | 3246   | 0.9   | 1.7   |
| 21 | 144.3 | 553  | 0.3  | 18044  | 4.9   | 9.7   |
| 22 | 151.0 | 611  | 0.2  | 3897   | 1.1   | 2.1   |
| 23 | 153.2 | 485  | 0.3  | 90275  | 24.6  | 48.3  |
| 24 | 153.9 | 734  | 0.2  | 4617   | 1.3   | 2.5   |
| 25 | 154.3 | 713  | 0.2  | 3991   | 1.1   | 2.1   |

## Compound Mass Spectrum List Report - MS

---

| #  | m/z   | Res. | FWHM | I      | I %  | S/N   |
|----|-------|------|------|--------|------|-------|
| 26 | 170.0 | 763  | 0.2  | 2560   | 0.7  | 1.4   |
| 27 | 171.4 | 701  | 0.2  | 6213   | 1.7  | 3.3   |
| 28 | 189.2 | 481  | 0.4  | 207694 | 56.7 | 111.2 |
| 29 | 190.3 | 729  | 0.3  | 25560  | 7.0  | 13.7  |
| 30 | 190.7 | 728  | 0.3  | 20316  | 5.5  | 10.9  |

# Compound Mass Spectrum List Report - MS

**+MS2(293.4),  
13.4min #990**

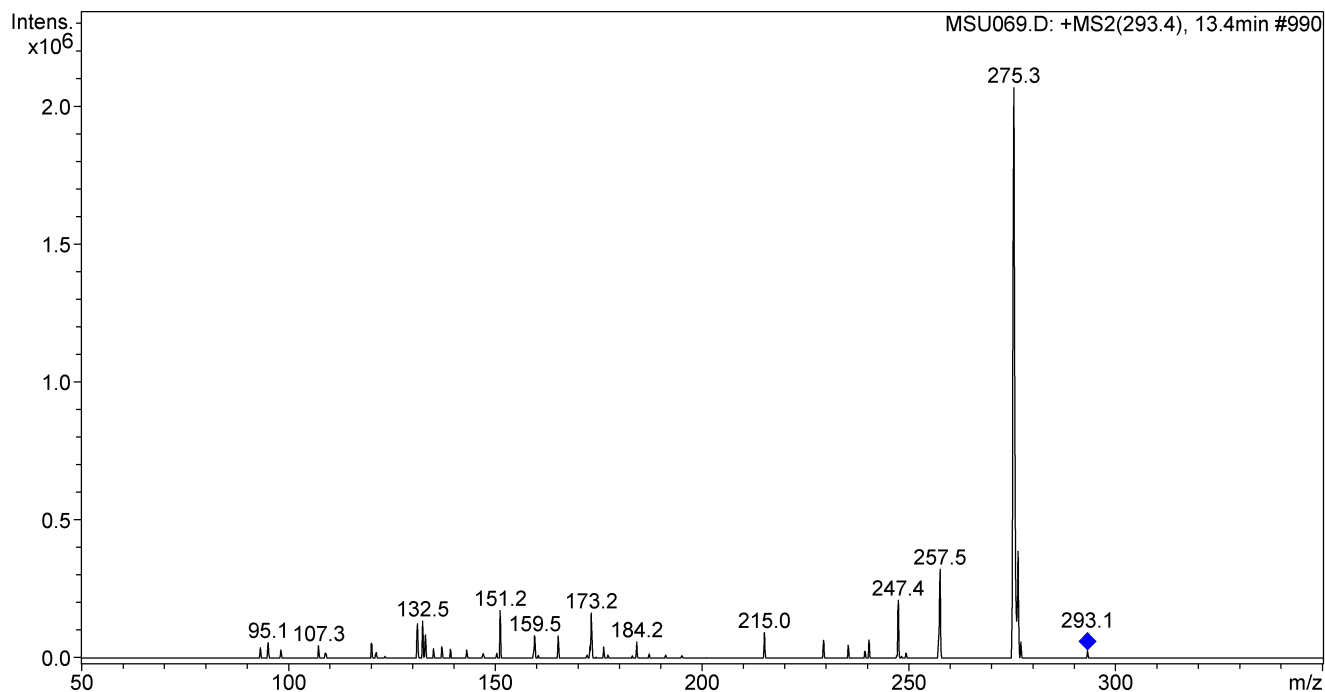

**Mass List:**

| #  | m/z   | Res. | FWHM | I      | I %  | S/N  |
|----|-------|------|------|--------|------|------|
| 1  | 93.3  | 376  | 0.2  | 37000  | 1.8  | 1.6  |
| 2  | 95.1  | 369  | 0.3  | 56143  | 2.7  | 2.5  |
| 3  | 98.2  | 401  | 0.2  | 29258  | 1.4  | 1.3  |
| 4  | 107.3 | 454  | 0.2  | 44181  | 2.1  | 2.0  |
| 5  | 120.1 | 472  | 0.3  | 53521  | 2.6  | 2.4  |
| 6  | 131.2 | 431  | 0.3  | 123843 | 6.0  | 5.5  |
| 7  | 132.5 | 545  | 0.2  | 133683 | 6.5  | 5.9  |
| 8  | 133.2 | 483  | 0.3  | 83683  | 4.0  | 3.7  |
| 9  | 135.1 | 584  | 0.2  | 33781  | 1.6  | 1.5  |
| 10 | 137.1 | 537  | 0.3  | 40866  | 2.0  | 1.8  |
| 11 | 139.2 | 627  | 0.2  | 30973  | 1.5  | 1.4  |
| 12 | 143.1 | 583  | 0.2  | 29613  | 1.4  | 1.3  |
| 13 | 151.2 | 678  | 0.2  | 172481 | 8.3  | 7.7  |
| 14 | 159.5 | 582  | 0.3  | 80035  | 3.9  | 3.6  |
| 15 | 165.2 | 662  | 0.2  | 80009  | 3.9  | 3.6  |
| 16 | 173.2 | 645  | 0.3  | 162368 | 7.9  | 7.2  |
| 17 | 176.2 | 785  | 0.2  | 40210  | 1.9  | 1.8  |
| 18 | 184.2 | 773  | 0.2  | 58333  | 2.8  | 2.6  |
| 19 | 215.0 | 833  | 0.3  | 92266  | 4.5  | 4.1  |
| 20 | 229.3 | 854  | 0.3  | 63496  | 3.1  | 2.8  |
| 21 | 235.3 | 1063 | 0.2  | 46974  | 2.3  | 2.1  |
| 22 | 239.3 | 933  | 0.3  | 24603  | 1.2  | 1.1  |
| 23 | 240.3 | 1021 | 0.2  | 65013  | 3.1  | 2.9  |
| 24 | 247.4 | 931  | 0.3  | 208725 | 10.1 | 9.3  |
| 25 | 257.5 | 920  | 0.3  | 321467 | 15.6 | 14.3 |

## Compound Mass Spectrum List Report - MS

---

| #  | m/z   | Res. | FWHM | I       | I %   | S/N  |
|----|-------|------|------|---------|-------|------|
| 26 | 275.3 | 594  | 0.5  | 2066559 | 100.0 | 91.7 |
| 27 | 276.3 | 1038 | 0.3  | 386608  | 18.7  | 17.2 |
| 28 | 277.0 | 1261 | 0.2  | 58130   | 2.8   | 2.6  |
| 29 | 293.1 | 1289 | 0.2  | 27157   | 1.3   | 1.2  |

# Compound Mass Spectrum List Report - MS

+MS2(313.2),  
13.9min #1030

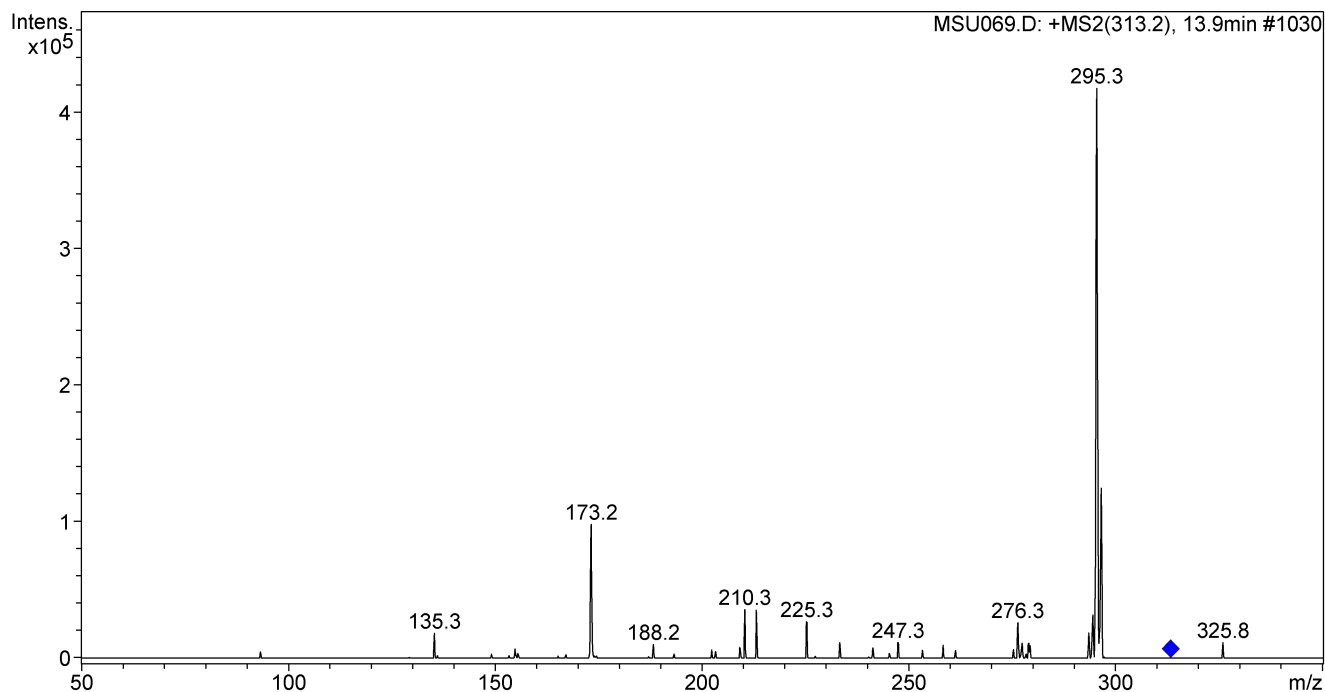

## Mass List:

| #  | m/z   | Res. | FWHM | I      | I %   | S/N  |
|----|-------|------|------|--------|-------|------|
| 1  | 135.3 | 608  | 0.2  | 18038  | 4.3   | 2.7  |
| 2  | 173.2 | 534  | 0.3  | 97897  | 23.5  | 14.7 |
| 3  | 188.2 | 817  | 0.2  | 9870   | 2.4   | 1.5  |
| 4  | 209.1 | 787  | 0.3  | 7844   | 1.9   | 1.2  |
| 5  | 210.3 | 932  | 0.2  | 35446  | 8.5   | 5.3  |
| 6  | 213.1 | 896  | 0.2  | 34916  | 8.4   | 5.3  |
| 7  | 225.3 | 868  | 0.3  | 26650  | 6.4   | 4.0  |
| 8  | 233.3 | 915  | 0.3  | 11412  | 2.7   | 1.7  |
| 9  | 241.3 | 929  | 0.3  | 7356   | 1.8   | 1.1  |
| 10 | 247.3 | 953  | 0.3  | 11389  | 2.7   | 1.7  |
| 11 | 258.2 | 1169 | 0.2  | 9497   | 2.3   | 1.4  |
| 12 | 276.3 | 894  | 0.3  | 25754  | 6.2   | 3.9  |
| 13 | 277.3 | 806  | 0.3  | 10727  | 2.6   | 1.6  |
| 14 | 278.9 | 1255 | 0.2  | 10921  | 2.6   | 1.6  |
| 15 | 279.2 | 1400 | 0.2  | 9005   | 2.2   | 1.4  |
| 16 | 293.4 | 1038 | 0.3  | 18389  | 4.4   | 2.8  |
| 17 | 294.4 | 921  | 0.3  | 31553  | 7.6   | 4.7  |
| 18 | 295.3 | 716  | 0.4  | 417211 | 100.0 | 62.8 |
| 19 | 296.4 | 897  | 0.3  | 124299 | 29.8  | 18.7 |
| 20 | 325.8 | 1464 | 0.2  | 11287  | 2.7   | 1.7  |



# Compound Mass Spectrum List Report - MS

+MS2(313.1),  
14.1min #1044

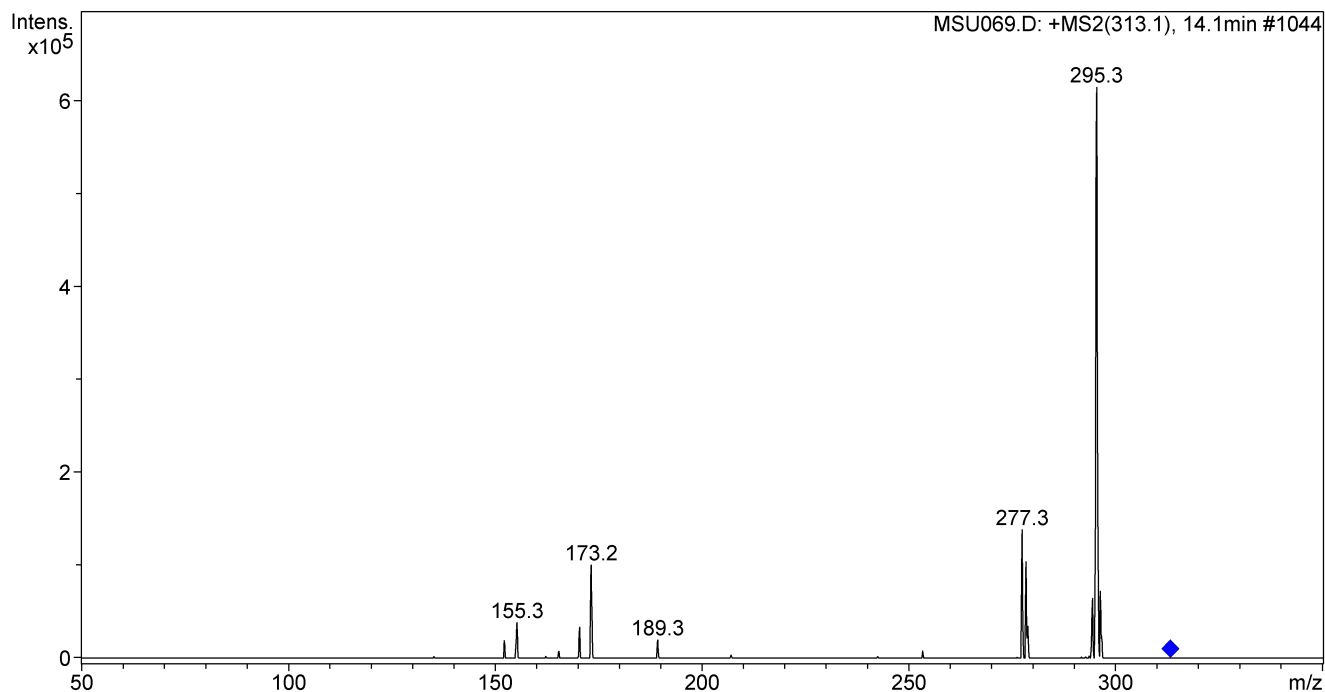

## Mass List:

| #  | m/z   | Res. | FWHM | I      | I %   | S/N  |
|----|-------|------|------|--------|-------|------|
| 1  | 152.2 | 661  | 0.2  | 18777  | 3.1   | 1.0  |
| 2  | 155.3 | 433  | 0.4  | 38082  | 6.2   | 2.0  |
| 3  | 170.4 | 659  | 0.3  | 33185  | 5.4   | 1.8  |
| 4  | 173.2 | 505  | 0.3  | 100108 | 16.3  | 5.3  |
| 5  | 189.3 | 729  | 0.3  | 19227  | 3.1   | 1.0  |
| 6  | 277.3 | 901  | 0.3  | 137914 | 22.5  | 7.3  |
| 7  | 278.2 | 1187 | 0.2  | 103324 | 16.8  | 5.5  |
| 8  | 278.7 | 1517 | 0.2  | 34283  | 5.6   | 1.8  |
| 9  | 294.3 | 957  | 0.3  | 64145  | 10.4  | 3.4  |
| 10 | 295.3 | 708  | 0.4  | 613896 | 100.0 | 32.7 |
| 11 | 296.2 | 1235 | 0.2  | 71928  | 11.7  | 3.8  |

# Compound Mass Spectrum List Report - MS

**+MS2(313.6),  
14.2min #1058**

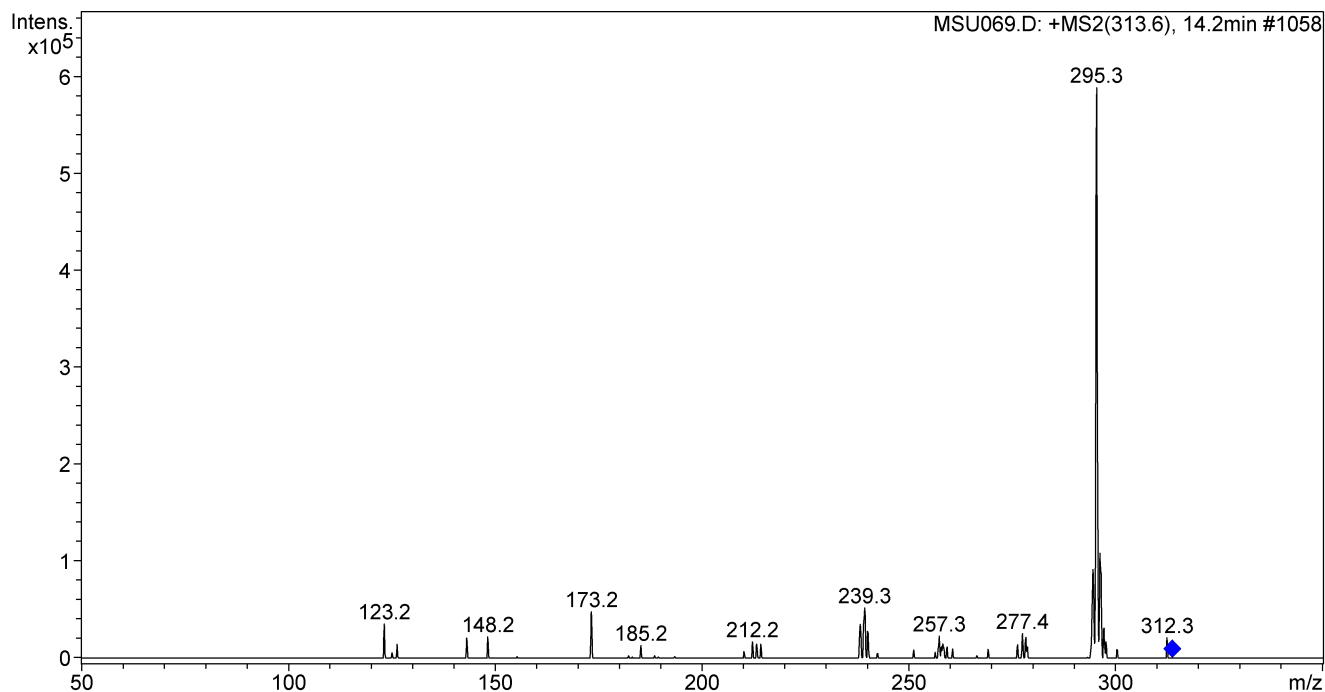

**Mass List:**

| #  | m/z   | Res. | FWHM | I      | I %   | S/N   |
|----|-------|------|------|--------|-------|-------|
| 1  | 123.2 | 517  | 0.2  | 35236  | 6.0   | 8.1   |
| 2  | 126.3 | 560  | 0.2  | 14321  | 2.4   | 3.3   |
| 3  | 143.1 | 560  | 0.3  | 20632  | 3.5   | 4.7   |
| 4  | 148.2 | 661  | 0.2  | 21705  | 3.7   | 5.0   |
| 5  | 173.2 | 624  | 0.3  | 47614  | 8.1   | 10.9  |
| 6  | 185.2 | 836  | 0.2  | 12888  | 2.2   | 3.0   |
| 7  | 212.2 | 843  | 0.3  | 16435  | 2.8   | 3.8   |
| 8  | 213.2 | 720  | 0.3  | 14130  | 2.4   | 3.2   |
| 9  | 214.2 | 915  | 0.2  | 14298  | 2.4   | 3.3   |
| 10 | 238.2 | 578  | 0.4  | 34614  | 5.9   | 7.9   |
| 11 | 239.3 | 475  | 0.5  | 51689  | 8.8   | 11.9  |
| 12 | 240.0 | 870  | 0.3  | 27623  | 4.7   | 6.3   |
| 13 | 251.1 | 1120 | 0.2  | 8281   | 1.4   | 1.9   |
| 14 | 257.3 | 726  | 0.4  | 22380  | 3.8   | 5.1   |
| 15 | 257.8 | 1560 | 0.2  | 11475  | 2.0   | 2.6   |
| 16 | 258.2 | 576  | 0.4  | 14618  | 2.5   | 3.4   |
| 17 | 259.2 | 994  | 0.3  | 11250  | 1.9   | 2.6   |
| 18 | 260.5 | 1170 | 0.2  | 9225   | 1.6   | 2.1   |
| 19 | 269.1 | 1166 | 0.2  | 8958   | 1.5   | 2.1   |
| 20 | 276.2 | 1048 | 0.3  | 13575  | 2.3   | 3.1   |
| 21 | 277.4 | 914  | 0.3  | 25276  | 4.3   | 5.8   |
| 22 | 278.2 | 1153 | 0.2  | 21349  | 3.6   | 4.9   |
| 23 | 278.5 | 1171 | 0.2  | 11269  | 1.9   | 2.6   |
| 24 | 294.4 | 708  | 0.4  | 91225  | 15.5  | 20.9  |
| 25 | 295.3 | 785  | 0.4  | 588158 | 100.0 | 134.9 |

## Compound Mass Spectrum List Report - MS

---

| #  | m/z   | Res. | FWHM | I      | I %  | S/N  |
|----|-------|------|------|--------|------|------|
| 26 | 296.2 | 610  | 0.5  | 108128 | 18.4 | 24.8 |
| 27 | 297.1 | 1051 | 0.3  | 30829  | 5.2  | 7.1  |
| 28 | 297.6 | 1241 | 0.2  | 16445  | 2.8  | 3.8  |
| 29 | 300.2 | 1160 | 0.3  | 8572   | 1.5  | 2.0  |
| 30 | 312.3 | 1404 | 0.2  | 21017  | 3.6  | 4.8  |

# Compound Mass Spectrum List Report - MS

+MS2(290.7),  
14.8min #1098

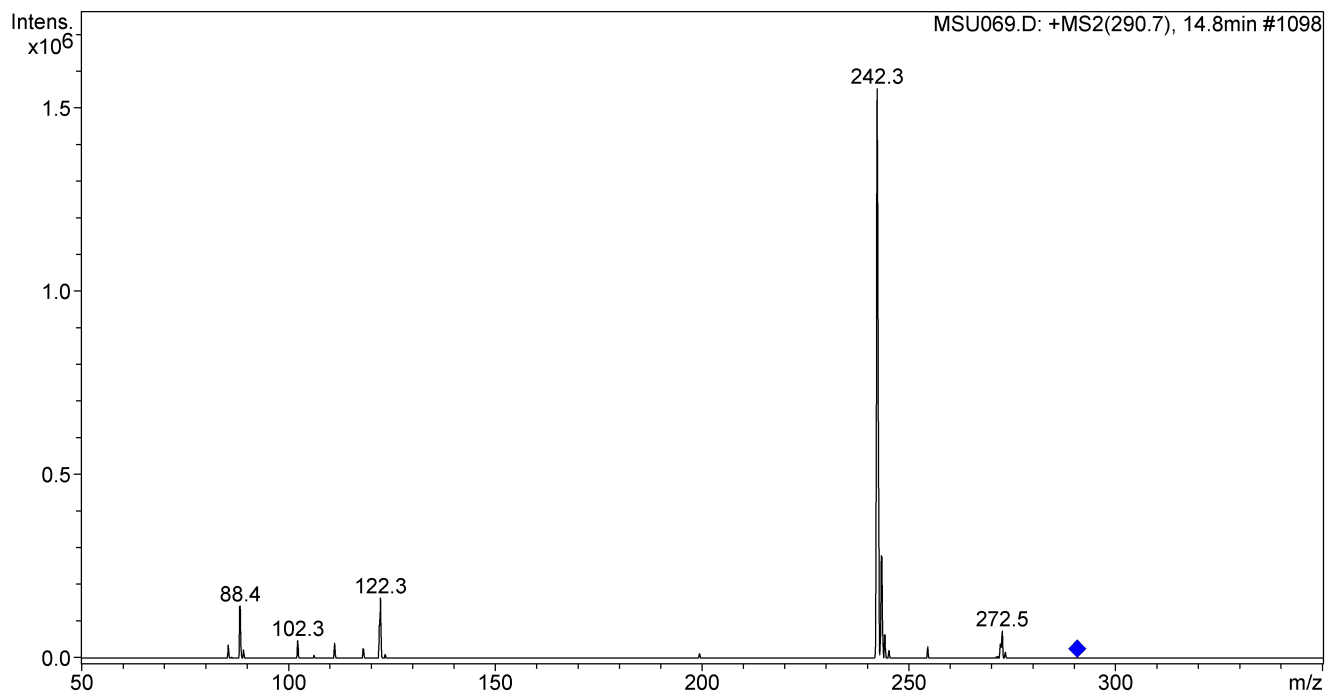

## Mass List:

| #  | m/z   | Res. | FWHM | I       | I %   | S/N  |
|----|-------|------|------|---------|-------|------|
| 1  | 85.5  | 360  | 0.2  | 34765   | 2.2   | 1.7  |
| 2  | 88.4  | 298  | 0.3  | 141784  | 9.1   | 7.0  |
| 3  | 89.2  | 394  | 0.2  | 21958   | 1.4   | 1.1  |
| 4  | 102.3 | 419  | 0.2  | 47292   | 3.0   | 2.3  |
| 5  | 111.2 | 461  | 0.2  | 40081   | 2.6   | 2.0  |
| 6  | 118.2 | 417  | 0.3  | 25321   | 1.6   | 1.3  |
| 7  | 122.3 | 281  | 0.4  | 163639  | 10.5  | 8.1  |
| 8  | 242.3 | 571  | 0.4  | 1551631 | 100.0 | 76.8 |
| 9  | 243.4 | 663  | 0.4  | 278598  | 18.0  | 13.8 |
| 10 | 244.1 | 954  | 0.3  | 64024   | 4.1   | 3.2  |
| 11 | 245.1 | 963  | 0.3  | 20487   | 1.3   | 1.0  |
| 12 | 254.5 | 1106 | 0.2  | 30325   | 2.0   | 1.5  |
| 13 | 272.1 | 1284 | 0.2  | 37484   | 2.4   | 1.9  |
| 14 | 272.5 | 1120 | 0.2  | 73675   | 4.7   | 3.6  |

# Compound Mass Spectrum List Report - MS

+MS2(332.0),  
16.0min #1196

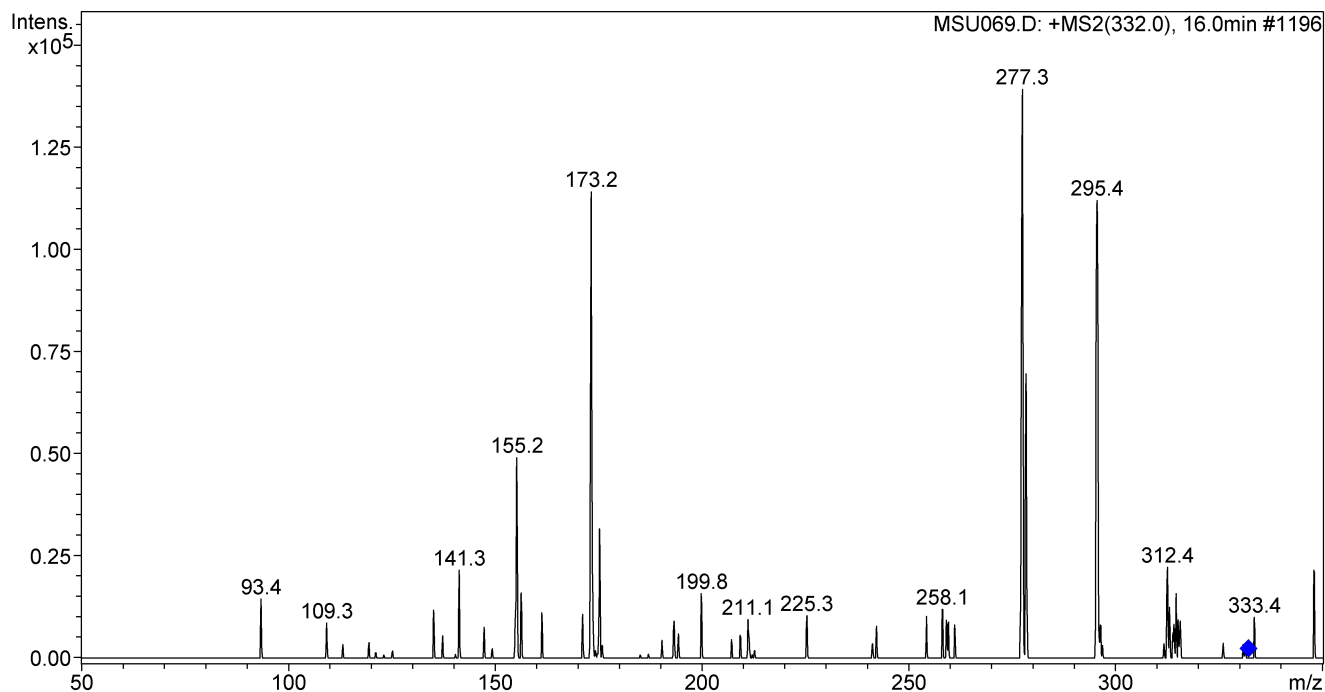

## Mass List:

| #  | m/z   | Res. | FWHM | I      | I %   | S/N  |
|----|-------|------|------|--------|-------|------|
| 1  | 93.4  | 402  | 0.2  | 14404  | 10.4  | 4.0  |
| 2  | 109.3 | 424  | 0.3  | 8542   | 6.1   | 2.4  |
| 3  | 135.1 | 523  | 0.3  | 11703  | 8.4   | 3.3  |
| 4  | 141.3 | 610  | 0.2  | 21463  | 15.4  | 6.0  |
| 5  | 155.2 | 484  | 0.3  | 49028  | 35.2  | 13.7 |
| 6  | 156.3 | 526  | 0.3  | 15903  | 11.4  | 4.4  |
| 7  | 161.3 | 721  | 0.2  | 11043  | 7.9   | 3.1  |
| 8  | 171.1 | 727  | 0.2  | 10683  | 7.7   | 3.0  |
| 9  | 173.2 | 522  | 0.3  | 114004 | 81.9  | 31.8 |
| 10 | 175.2 | 664  | 0.3  | 31559  | 22.7  | 8.8  |
| 11 | 193.2 | 594  | 0.3  | 9053   | 6.5   | 2.5  |
| 12 | 199.8 | 832  | 0.2  | 15783  | 11.3  | 4.4  |
| 13 | 211.1 | 569  | 0.4  | 9411   | 6.8   | 2.6  |
| 14 | 225.3 | 767  | 0.3  | 10389  | 7.5   | 2.9  |
| 15 | 254.2 | 1140 | 0.2  | 10208  | 7.3   | 2.8  |
| 16 | 258.1 | 986  | 0.3  | 11949  | 8.6   | 3.3  |
| 17 | 259.0 | 1099 | 0.2  | 9225   | 6.6   | 2.6  |
| 18 | 259.5 | 1127 | 0.2  | 8822   | 6.3   | 2.5  |
| 19 | 277.3 | 613  | 0.5  | 139123 | 100.0 | 38.8 |
| 20 | 278.2 | 827  | 0.3  | 69524  | 50.0  | 19.4 |
| 21 | 295.4 | 577  | 0.5  | 111898 | 80.4  | 31.2 |
| 22 | 296.2 | 1218 | 0.2  | 8103   | 5.8   | 2.3  |
| 23 | 312.4 | 975  | 0.3  | 22199  | 16.0  | 6.2  |
| 24 | 312.9 | 1265 | 0.2  | 12361  | 8.9   | 3.4  |
| 25 | 314.0 | 1708 | 0.2  | 8240   | 5.9   | 2.3  |

## Compound Mass Spectrum List Report - MS

---

| #  | m/z   | Res. | FWHM | I     | I %  | S/N |
|----|-------|------|------|-------|------|-----|
| 26 | 314.5 | 1436 | 0.2  | 15753 | 11.3 | 4.4 |
| 27 | 315.0 | 1559 | 0.2  | 9328  | 6.7  | 2.6 |
| 28 | 315.5 | 1199 | 0.3  | 9056  | 6.5  | 2.5 |
| 29 | 333.4 | 1458 | 0.2  | 9940  | 7.1  | 2.8 |
| 30 | 347.9 | 1339 | 0.3  | 21454 | 15.4 | 6.0 |
